# Supplementary material
Source: PubMed Central journal article supplement (PMC3822612)
Supplement: NIHMS516529-supplement-Supplementary_Fig__1.pdf [file NIHMS516529-supplement-Supplementary_Fig__1.pdf]

## Effect of Carbon Nanotube Exposure: Histone & Histone-associated Proteins

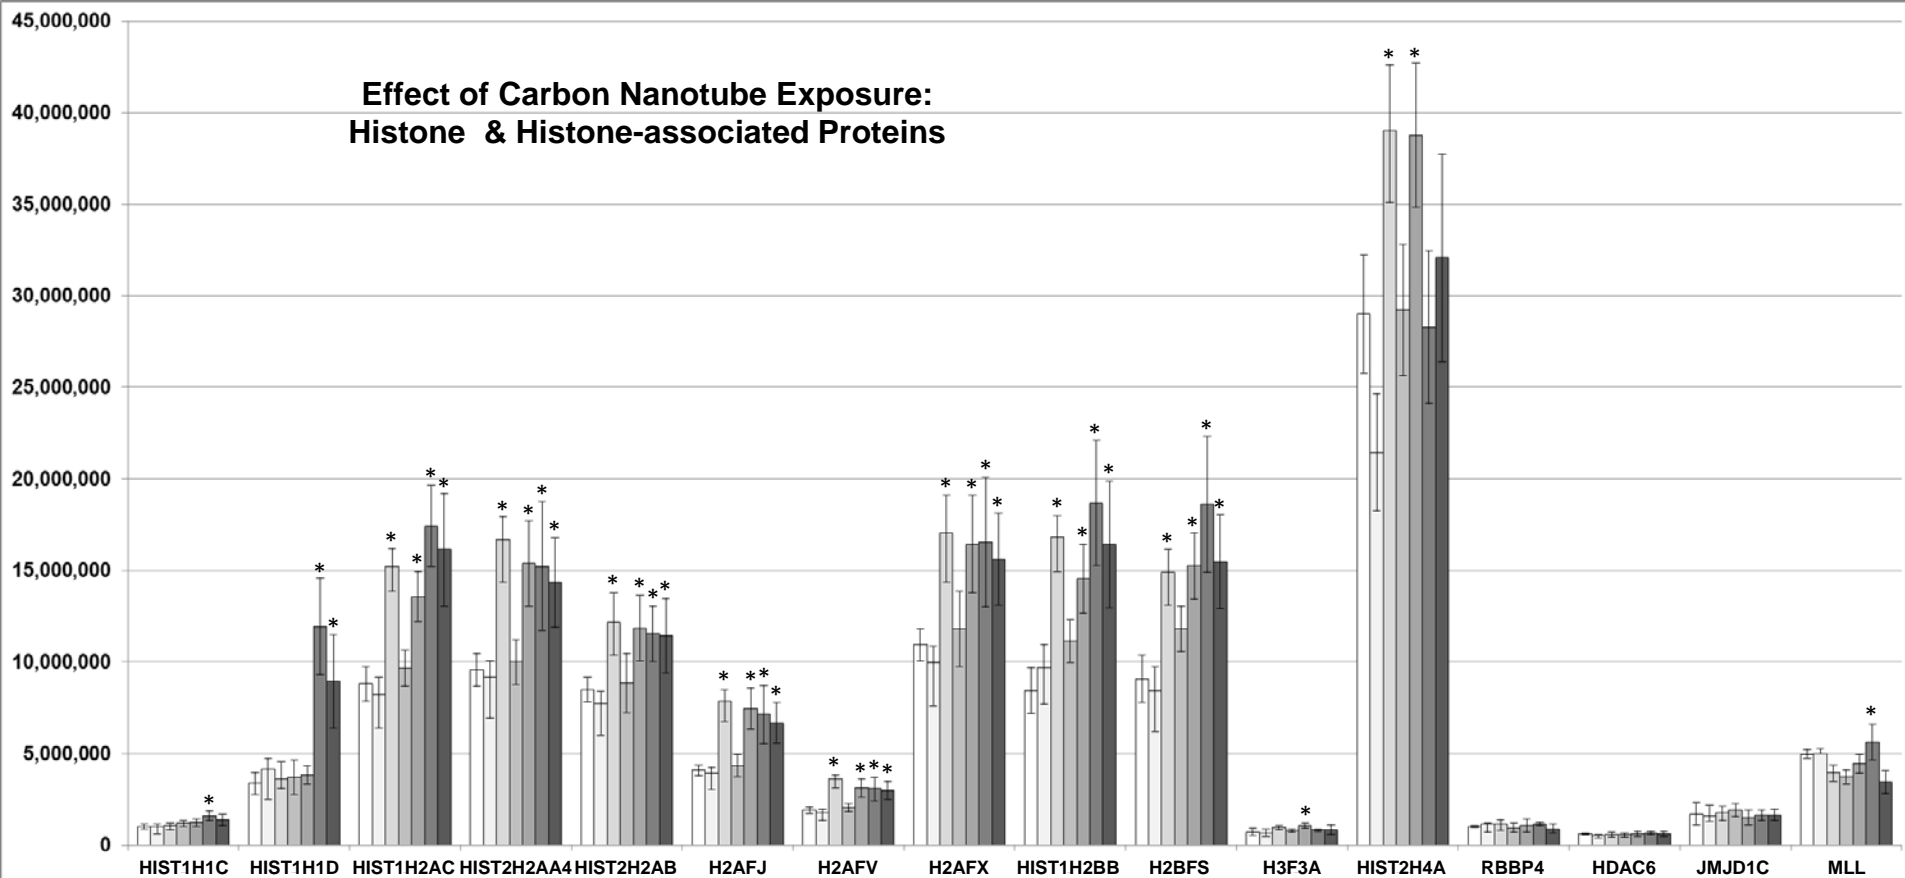

**Supplemental Figure 1.** Effect of 48 h f-CNT exposure on the expression of histone and histone related proteins. Values are mean  $\pm$  SD of protein quantity, calculated by IdentiQuantXL™ based on peptide intensity as measured by LC-MS/MS. \*  $p < .01$  via ANOVA and  $p < .05$  via Holm-Sidak *post hoc* multiple comparisons.

- Control
- SWCNT-COOH 500 pg/mL
- SWCNT-COOH 10 µg/mL
- MWCNT-COOH 500 pg/mL
- MWCNT-COOH 10 µg/mL
- MWCNT-PVP 500 pg/mL
- MWCNT-PVP 10 µg/mL

|            |                                               |
|------------|-----------------------------------------------|
| HIST1H1C   |                                               |
| HIST1H1D   | Histone H1.3                                  |
| HIST1H2AC  | Histone H2A type 1-C                          |
| HIST2H2AA4 | Histone H2A type 2-A                          |
| HIST2H2AB  | Histone H2A type 2-B                          |
| H2AFJ      | Histone H2A.J, Isoform 1                      |
| H2AFV      | Histone H2A.V                                 |
| H2AFX      | Histone H2A.x                                 |
| HIST1H2BB  | Histone H2B type 1-B                          |
| H2BFS      | Histone H2B type F-S                          |
| H3F3A      | Histone H3.3                                  |
| HIST2H4A   | Histone H4                                    |
| RBBP4      | Histone-binding protein RBBP4                 |
| HDAC6      | Histone deacetylase 6                         |
| JMJD1C     | Histone demethylation protein 2C, Isoform 1   |
| MLL        | Histone-lysine N-methyltransferase, Isoform 1 |
