# Supplementary material
Source: PubMed Central journal article supplement (PMC3822612)
Supplement: NIHMS516529-supplement-Supplementary_Table_1.pdf [file NIHMS516529-supplement-Supplementary_Table_1.pdf]

[illegible]

[illegible]





[illegible]

[illegible]

[illegible]





[illegible]





[illegible]

[illegible]

[illegible]







[illegible]

[illegible]

[illegible]





[illegible]

[illegible]







[illegible]



[illegible]

|             |      |                                                           |       |                 |   |        |           |           |           |           |           |           |           |           |         |         |           |           |         |           |       |       |       |       |       |       |       |
|-------------|------|-----------------------------------------------------------|-------|-----------------|---|--------|-----------|-----------|-----------|-----------|-----------|-----------|-----------|-----------|---------|---------|-----------|-----------|---------|-----------|-------|-------|-------|-------|-------|-------|-------|
| IPI00022314 | SOD2 | Superoxide dismutase [Mn], mitochondrial                  | 0.999 | 6.31            | 1 | 1      | 1,401,445 | 1,386,888 | 1,460,830 | 1,418,498 | 1,382,540 | 1,765,605 | 1,592,653 | 183,430   | 246,592 | 218,820 | 289,796   | 277,374   | 216,875 | 349,117   | 13.09 | 17.78 | 14.98 | 20.43 | 20.06 | 12.28 | 21.92 |
| IPI00607577 | SOD2 | superoxide dismutase 2, mitochondrial isoform B precursor | 0.999 | 7.65            | 1 | 1      | 1,401,445 | 1,386,888 | 1,460,830 | 1,418,498 | 1,382,540 | 1,765,605 | 1,592,653 | 183,430   | 246,592 | 218,820 | 289,796   | 277,374   | 216,875 | 349,117   | 13.09 | 17.78 | 14.98 | 20.43 | 20.06 | 12.28 | 21.92 |
| IPI00847322 | SOD2 | superoxide dismutase 2, mitochondrial isoform A precursor | 0.999 | 6.31            | 1 | 1      | 1,401,445 | 1,386,888 | 1,460,830 | 1,418,498 | 1,382,540 | 1,765,605 | 1,592,653 | 183,430   | 246,592 | 218,820 | 289,796   | 277,374   | 216,875 | 349,117   | 13.09 | 17.78 | 14.98 | 20.43 | 20.06 | 12.28 | 21.92 |
| IPI00911015 | SOD2 | Superoxide dismutase                                      | 0.999 | 8.64            | 1 | 1      | 1,401,445 | 1,386,888 | 1,460,830 | 1,418,498 | 1,382,540 | 1,765,605 | 1,592,653 | 183,430   | 246,592 | 218,820 | 289,796   | 277,374   | 216,875 | 349,117   | 13.09 | 17.78 | 14.98 | 20.43 | 20.06 | 12.28 | 21.92 |
|             |      |                                                           |       | AIWNVINWENVTER  | 2 | 0.9992 |           |           |           |           |           |           |           |           |         |         |           |           |         |           |       |       |       |       |       |       |       |
| IPI00022334 | OAT  | Ornithine aminotransferase, mitochondrial                 | 0.994 | 3.64            | 1 | 1      | 5,548,340 | 5,082,380 | 6,805,450 | 5,613,540 | 6,650,570 | 6,928,160 | 6,624,380 | 326,112   | 919,601 | 909,032 | 1,482,880 | 1,066,479 | 704,119 | 1,307,413 | 5.88  | 18.09 | 13.36 | 26.42 | 16.04 | 10.16 | 19.74 |
|             |      |                                                           |       | AFYNNVLGEYEEYTK | 2 | 0.9942 |           |           |           |           |           |           |           |           |         |         |           |           |         |           |       |       |       |       |       |       |       |
| IPI00022431 | AHSG | cDNA FLJ55606, highly similar to Alpha-2-HS-glycoprotein  | 0.95  | 1.39            | 1 | 1      | 1,610,870 | 1,994,320 | 1,309,690 | 1,418,923 | 1,419,770 | 1,823,423 | 1,240,537 | 447,784   | 556,575 | 174,042 | 277,700   | 567,708   | 447,796 | 236,544   | 27.8  | 27.91 | 13.29 | 19.57 | 39.99 | 24.56 | 19.07 |
| IPI00795830 | AHSG | 29 kDa protein                                            | 0.95  | 2.3             | 1 | 1      | 1,610,870 | 1,994,320 | 1,309,690 | 1,418,923 | 1,419,770 | 1,823,423 | 1,240,537 | 447,784   | 556,575 | 174,042 | 277,700   | 567,708   | 447,796 | 236,544   | 27.8  | 27.91 | 13.29 | 19.57 | 39.99 | 24.56 | 19.07 |
| IPI00953689 | AHSG | Alpha-2-HS-glycoprotein                                   | 0.95  | 1.63            | 1 | 1      | 1,610,870 | 1,994,320 | 1,309,690 | 1,418,923 | 1,419,770 | 1,823,423 | 1,240,537 | 447,784   | 556,575 | 174,042 | 277,700   | 567,708   | 447,796 | 236,544   | 27.8  | 27.91 | 13.29 | 19.57 | 39.99 | 24.56 | 19.07 |
|             |      |                                                           |       | QYGFCCK         | 2 | 0.9207 |           |           |           |           |           |           |           |           |         |         |           |           |         |           |       |       |       |       |       |       |       |
| IPI00022434 | ALB  | Putative uncharacterized protein ALB                      | 1     | 4.63            | 3 | 4      | 5,084,771 | 5,035,370 | 3,688,204 | 4,316,552 | 3,974,882 | 4,279,408 | 4,076,865 | 1,021,715 | 956,280 | 612,785 | 645,554   | 615,967   | 319,568 | 568,313   | 20.09 | 18.99 | 16.61 | 14.96 | 15.5  | 7.47  | 13.94 |
| IPI00745872 | ALB  | Isoform 1 of Serum albumin                                | 1     | 4.76            | 3 | 4      | 5,084,771 | 5,035,370 | 3,688,204 | 4,316,552 | 3,974,882 | 4,279,408 | 4,076,865 | 1,021,715 | 956,280 | 612,785 | 645,554   | 615,967   | 319,568 | 568,313   | 20.09 | 18.99 | 16.61 | 14.96 | 15.5  | 7.47  | 13.94 |
| IPI00908876 | ALB  | cDNA FLJ50830, highly similar to Serum albumin            | 1     | 5.54            | 3 | 4      | 5,084,771 | 5,035,370 | 3,688,204 | 4,316,552 | 3,974,882 | 4,279,408 | 4,076,865 | 1,021,715 | 956,280 | 612,785 | 645,554   | 615,967   | 319,568 | 568,313   | 20.09 | 18.99 | 16.61 | 14.96 | 15.5  | 7.47  | 13.94 |
| IPI00965913 | ALB  | Protein                                                   | 1     | 6.39            | 3 | 4      | 5,084,771 | 5,035,370 | 3,688,204 | 4,316,552 | 3,974,882 | 4,279,408 | 4,076,865 | 1,        |         |         |           |           |         |           |       |       |       |       |       |       |       |







[illegible]

[illegible]

[illegible]



[illegible]

[illegible]

[illegible]





[illegible]





[illegible]



[illegible]

[illegible]

[illegible]



[illegible]

|             |                |                                                |       |       |   |   |            |            |            |            |            |             |            |           |            |           |           |            |            |            |       |       |       |       |       |       |       |
|-------------|----------------|------------------------------------------------|-------|-------|---|---|------------|------------|------------|------------|------------|-------------|------------|-----------|------------|-----------|-----------|------------|------------|------------|-------|-------|-------|-------|-------|-------|-------|
| IPI00178188 | DYNLRB2        | Dynein light chain roadblock-type 2            | 1     | 12.5  | 1 | 1 | 2,345,195  | 2,376,838  | 2,262,825  | 2,210,920  | 2,267,848  | 2,947,890   | 2,292,833  | 287,473   | 601,567    | 287,416   | 589,677   | 292,718    | 205,028    | 582,085    | 12.26 | 25.31 | 12.7  | 26.67 | 12.91 | 6.96  | 25.39 |
|             |                |                                                |       |       |   |   |            |            |            |            |            |             |            |           |            |           |           |            |            |            |       |       |       |       |       |       |       |
|             |                |                                                |       |       |   |   |            |            |            |            |            |             |            |           |            |           |           |            |            |            |       |       |       |       |       |       |       |
| IPI00178352 | FLNC           | Isoform 1 of Filamin-C                         | 0.984 | 0.92  | 2 | 2 | 6,704,280  | 6,374,495  | 6,726,675  | 6,948,875  | 6,515,410  | 8,054,345   | 6,289,460  | 827,586   | 1,208,337  | 710,207   | 1,068,296 | 827,740    | 547,546    | 1,342,763  | 12.34 | 18.96 | 10.56 | 15.37 | 12.7  | 6.8   | 21.35 |
| IPI00413958 | FLNC           | Isoform 2 of Filamin-C                         | 0.984 | 0.93  | 2 | 2 | 6,704,280  | 6,374,495  | 6,726,675  | 6,948,875  | 6,515,410  | 8,054,345   | 6,289,460  | 827,586   | 1,208,337  | 710,207   | 1,068,296 | 827,740    | 547,546    | 1,342,763  | 12.34 | 18.96 | 10.56 | 15.37 | 12.7  | 6.8   | 21.35 |
|             |                |                                                |       |       |   |   |            |            |            |            |            |             |            |           |            |           |           |            |            |            |       |       |       |       |       |       |       |
|             |                |                                                |       |       |   |   |            |            |            |            |            |             |            |           |            |           |           |            |            |            |       |       |       |       |       |       |       |
|             |                |                                                |       |       |   |   |            |            |            |            |            |             |            |           |            |           |           |            |            |            |       |       |       |       |       |       |       |
| IPI00178440 | SNORA41;EEF1B2 | Elongation factor 1-beta                       | 1     | 37.33 | 5 | 5 | 97,213,920 | 98,769,880 | 77,072,240 | 81,650,430 | 83,317,940 | 108,130,060 | 78,372,920 | 4,643,163 | 26,881,541 | 8,162,580 | 8,409,022 | 10,946,043 | 13,736,011 | 17,468,055 | 4.78  | 27.22 | 10.59 | 10.3  | 13.14 | 12.7  | 22.29 |
|             |                |                                                |       |       |   |   |            |            |            |            |            |             |            |           |            |           |           |            |            |            |       |       |       |       |       |       |       |
|             |                |                                                |       |       |   |   |            |            |            |            |            |             |            |           |            |           |           |            |            |            |       |       |       |       |       |       |       |
|             |                |                                                |       |       |   |   |            |            |            |            |            |             |            |           |            |           |           |            |            |            |       |       |       |       |       |       |       |
|             |                |                                                |       |       |   |   |            |            |            |            |            |             |            |           |            |           |           |            |            |            |       |       |       |       |       |       |       |
|             |                |                                                |       |       |   |   |            |            |            |            |            |             |            |           |            |           |           |            |            |            |       |       |       |       |       |       |       |
|             |                |                                                |       |       |   |   |            |            |            |            |            |             |            |           |            |           |           |            |            |            |       |       |       |       |       |       |       |
|             |                |                                                |       |       |   |   |            |            |            |            |            |             |            |           |            |           |           |            |            |            |       |       |       |       |       |       |       |
| IPI00179138 | SF3B3          | Isoform 2 of Splicing factor 3B subunit 3      | 1     | 12    | 3 | 3 | 14,421,525 | 13,572,390 | 13,800,310 | 14,748,565 | 13,336,825 | 17,507,725  | 13,172,480 | 1,244,557 | 3,499,723  | 1,182,636 | 2,764,213 | 1,571,042  | 1,912,175  | 3,028,488  | 8.63  | 25.79 | 8.57  | 18.74 | 11.78 | 10.92 | 22.99 |
|             |                |                                                |       |       |   |   |            |            |            |            |            |             |            |           |            |           |           |            |            |            |       |       |       |       |       |       |       |
|             |                |                                                |       |       |   |   |            |            |            |            |            |             |            |           |            |           |           |            |            |            |       |       |       |       |       |       |       |
|             |                |                                                |       |       |   |   |            |            |            |            |            |             |            |           |            |           |           |            |            |            |       |       |       |       |       |       |       |
|             |                |                                                |       |       |   |   |            |            |            |            |            |             |            |           |            |           |           |            |            |            |       |       |       |       |       |       |       |
|             |                |                                                |       |       |   |   |            |            |            |            |            |             |            |           |            |           |           |            |            |            |       |       |       |       |       |       |       |
| IPI00179298 | HUWE1          | 482 kDa protein                                | 1     | 0.98  | 2 | 2 | 540,621    | 515,058    | 546,067    | 642,780    | 613,845    | 565,430     | 574,881    | 65,302    | 111,122    | 89,897    | 109,733   | 125,556    | 127,878    | 130,915    | 12.08 | 21.57 | 16.46 | 17.07 | 20.45 | 22.62 | 22.77 |
| IPI00445401 | HUWE1          | Isoform 2 of E3 ubiquitin-protein ligase HUWE1 | 1     | 0.99  | 2 | 2 | 540,621    | 515,058    | 546,067    | 642,780    | 613,845    | 565,430     | 574,881    | 65,302    | 111,122    | 89,897    | 109,733   | 125,556    | 127,878    | 130,91     |       |       |       |       |       |       |       |



[illegible]









[illegible]

[illegible]

[illegible]

[illegible]



[illegible]

[illegible]

[illegible]

[illegible]







[illegible]

[illegible]

[illegible]



[illegible]



[illegible]

[illegible]

[illegible]



[illegible]

[illegible]



[illegible]

[illegible]

[illegible]

[illegible]

[illegible]



[illegible]

[illegible]











[illegible]



[illegible]







[illegible]

[illegible]

[illegible]



[illegible]

[illegible]

[illegible]

[illegible]







|             |           |                                                                          |       |                                   |   |        |           |           |           |           |           |           |           |           |           |         |         |           |           |           |       |       |       |       |       |       |       |
|-------------|-----------|--------------------------------------------------------------------------|-------|-----------------------------------|---|--------|-----------|-----------|-----------|-----------|-----------|-----------|-----------|-----------|-----------|---------|---------|-----------|-----------|-----------|-------|-------|-------|-------|-------|-------|-------|
| IPI00798140 | FLNB      | 111 kDa protein                                                          | 0.926 | 1.33                              | 1 | 1      | 505,169   | 534,332   | 470,509   | 467,697   | 459,881   | 581,153   | 495,193   | 57,537    | 158,530   | 124,544 | 73,790  | 130,480   | 131,455   | 116,953   | 11.39 | 29.67 | 26.47 | 15.78 | 28.37 | 22.62 | 23.62 |
| IPI00945771 | FLNB      | Filamin B variant 2                                                      | 0.926 | 19.44                             | 1 | 1      | 505,169   | 534,332   | 470,509   | 467,697   | 459,881   | 581,153   | 495,193   | 57,537    | 158,530   | 124,544 | 73,790  | 130,480   | 131,455   | 116,953   | 11.39 | 29.67 | 26.47 | 15.78 | 28.37 | 22.62 | 23.62 |
| IPI00798302 | EIF4B     | cDNA FU59405, highly similar to Eukaryotic translation initiation factor | 1     | FADEHVPGSPTVK                     | 3 | 0.9256 |           |           |           |           |           |           |           |           |           |         |         |           |           |           |       |       |       |       |       |       |       |
|             |           |                                                                          |       | 4.37                              | 1 | 1      | 1,623,883 | 1,505,763 | 1,600,670 | 1,553,818 | 1,408,530 | 1,967,263 | 1,637,253 | 224,775   | 291,471   | 309,225 | 137,741 | 98,861    | 291,533   | 410,143   | 13.84 | 19.36 | 19.32 | 8.86  | 7.02  | 14.82 | 25.05 |
| IPI00798360 | SARNP     | 18 kDa protein                                                           | 1     | SPPYTAFLGNLPYDVTTEESIKEFFR        | 3 | 0.9997 |           |           |           |           |           |           |           |           |           |         |         |           |           |           |       |       |       |       |       |       |       |
|             |           |                                                                          |       | 11.73                             | 2 | 2      | 1,254,476 | 1,222,331 | 1,335,276 | 1,398,545 | 1,087,808 | 1,392,013 | 1,277,070 | 319,442   | 292,945   | 158,456 | 147,325 | 264,765   | 321,943   | 373,071   | 25.46 | 23.97 | 11.87 | 10.53 | 24.34 | 23.13 | 29.21 |
|             |           |                                                                          |       | FGISSVPTK                         | 2 | 0.9992 |           |           |           |           |           |           |           |           |           |         |         |           |           |           |       |       |       |       |       |       |       |
|             |           |                                                                          |       | ITSEIPQTER                        | 2 | 0.996  |           |           |           |           |           |           |           |           |           |         |         |           |           |           |       |       |       |       |       |       |       |
| IPI00798367 | RUVBL1    | 17 kDa protein                                                           | 1     | 25                                | 2 | 2      | 5,692,799 | 6,128,538 | 6,783,333 | 6,741,073 | 6,480,195 | 8,400,427 | 5,083,115 | 1,209,637 | 2,288,169 | 448,325 | 555,699 | 1,346,168 | 2,288,473 | 1,030,260 | 21.25 | 37.34 | 6.61  | 8.24  | 20.77 | 27.24 | 20.27 |
|             |           |                                                                          |       | ALESSIAPIVIFASNR                  | 2 | 0.9816 |           |           |           |           |           |           |           |           |           |         |         |           |           |           |       |       |       |       |       |       |       |
|             |           |                                                                          |       | AQTEGINISEEALNHLGEIGTK            | 3 | 0.9996 |           |           |           |           |           |           |           |           |           |         |         |           |           |           |       |       |       |       |       |       |       |
| IPI00798401 | CORO1C    | cDNA FU50992, highly similar to Coronin-1C                               | 0.999 | 8.92                              | 2 | 2      | 1,063,794 | 1,091,207 | 1,116,436 | 1,118,490 | 1,134,533 | 1,310,870 | 1,240,215 | 56,981    | 257,355   | 186,159 | 72,777  | 98,082    | 150,489   | 200,316   | 5.36  | 23.58 | 16.67 | 6.51  | 8.65  | 11.48 | 16.15 |
| IPI00867509 | CORO1C    | Coronin-1C_i3 protein                                                    | 0.999 | 7.4                               | 2 | 2      | 1,063,794 | 1,091,207 | 1,116,436 | 1,118,490 | 1,134,533 | 1,310,870 | 1,240,215 | 56,981    | 257,355   | 186,159 | 72,777  | 98,082    | 150,489   | 200,316   | 5.36  | 23.58 | 16.67 | 6.51  | 8.65  | 11.48 | 16.15 |
| IPI00943173 | CORO1C    | Coronin-1C                                                               | 0.999 | 8.23                              | 2 | 2      | 1,063,794 | 1,091,207 | 1,116,436 | 1,118,490 | 1,134,533 | 1,310,870 | 1,240,215 | 56,981    | 257,355   | 186,159 | 72,777  | 98,082    | 150,489   | 200,316   | 5.36  | 23.58 | 16.67 | 6.51  | 8.65  | 11.48 | 16.15 |
|             |           |                                                                          |       | KSDLFQDDLYPDTAGPEAALEAEWFEGK      | 3 | 0.9996 |           |           |           |           |           |           |           |           |           |         |         |           |           |           |       |       |       |       |       |       |       |
|             |           |                                                                          |       | NGSLICTASK                        | 2 | 0.8811 |           |           |           |           |           |           |           |           |           |         |         |           |           |           |       |       |       |       |       |       |       |
| IPI00807377 | LOC642587 | hypothetical protein LOC642587                                           | 0.905 | 34.31                             | 1 | 1      | 366,366   | 395,165   | 387,305   | 349,531   | 344,852   | 483,824   | 334,713   | 36,487    | 80,584    | 86,077  | 42,990  | 71,225    | 132,307   | 45,936    | 9.96  | 20.39 | 22.22 | 12.3  | 20.65 | 27.35 | 13.72 |
|             |           |                                                                          |       | HGADNHEASAAATATTAAATTVAAAAAATAAAR | 3 | 0.9049 |           |           |           |           |           |           |           |           |           |         |         |           |           |           |       |       |       |       |       |       |       |
| IPI00807416 | TRBV11-1  | V_segment translation product                                            | 0.959 | 5.7                               | 1 | 1      | 9,025,340 | 19,4      |           |           |           |           |           |           |           |         |         |           |           |           |       |       |       |       |       |       |       |

[illegible]

[illegible]





[illegible]

[illegible]

[illegible]

[illegible]

[illegible]



[illegible]

[illegible]

[illegible]

[illegible]



[illegible]

|             |        |                                                                      |   |                               |   |        |            |            |            |            |            |            |            |           |           |           |           |           |           |           |       |       |       |       |       |       |       |
|-------------|--------|----------------------------------------------------------------------|---|-------------------------------|---|--------|------------|------------|------------|------------|------------|------------|------------|-----------|-----------|-----------|-----------|-----------|-----------|-----------|-------|-------|-------|-------|-------|-------|-------|
| IPI00940257 | CCT5   | cDNA FLJ52361, highly similar to T-complex protein 1 subunit epsilon | 1 | 23.25                         | 8 | 8      | 12,017,937 | 11,446,767 | 10,556,009 | 11,209,902 | 10,881,567 | 13,095,453 | 10,901,948 | 886,647   | 2,045,468 | 1,241,483 | 690,648   | 1,070,956 | 847,170   | 1,847,307 | 7.38  | 17.87 | 11.76 | 6.16  | 9.84  | 6.47  | 16.94 |
| IPI00964855 | CCT5   | 57 kDa protein                                                       | 1 | 21.94                         | 8 | 8      | 12,017,937 | 11,446,767 | 10,556,009 | 11,209,902 | 10,881,567 | 13,095,453 | 10,901,948 | 886,647   | 2,045,468 | 1,241,483 | 690,648   | 1,070,956 | 847,170   | 1,847,307 | 7.38  | 17.87 | 11.76 | 6.16  | 9.84  | 6.47  | 16.94 |
| IPI00965722 | CCT5   | cDNA FLJ54333, highly similar to T-complex protein 1 subunit epsilon | 1 | 21.98                         | 8 | 8      | 12,017,937 | 11,446,767 | 10,556,009 | 11,209,902 | 10,881,567 | 13,095,453 | 10,901,948 | 886,647   | 2,045,468 | 1,241,483 | 690,648   | 1,070,956 | 847,170   | 1,847,307 | 7.38  | 17.87 | 11.76 | 6.16  | 9.84  | 6.47  | 16.94 |
|             |        |                                                                      |   | ETGANLAICQWGFDDDEANHLLQNNLPVR | 3 | 0.9998 |            |            |            |            |            |            |            |           |           |           |           |           |           |           |       |       |       |       |       |       |       |
|             |        |                                                                      |   | FEEMIQQIK                     | 2 | 0.9985 |            |            |            |            |            |            |            |           |           |           |           |           |           |           |       |       |       |       |       |       |       |
|             |        |                                                                      |   | IAILTCPFEPKPK                 | 3 | 0.9997 |            |            |            |            |            |            |            |           |           |           |           |           |           |           |       |       |       |       |       |       |       |
|             |        |                                                                      |   | LGFAGLVQEISFGTTK              | 2 | 0.9998 |            |            |            |            |            |            |            |           |           |           |           |           |           |           |       |       |       |       |       |       |       |
|             |        |                                                                      |   | LMGLEALK                      | 2 | 0.9983 |            |            |            |            |            |            |            |           |           |           |           |           |           |           |       |       |       |       |       |       |       |
|             |        |                                                                      |   | MLVIEQCK                      | 2 | 0.9953 |            |            |            |            |            |            |            |           |           |           |           |           |           |           |       |       |       |       |       |       |       |
|             |        |                                                                      |   | QQHVETLIGK                    | 3 | 0.9997 |            |            |            |            |            |            |            |           |           |           |           |           |           |           |       |       |       |       |       |       |       |
|             |        |                                                                      |   | WVGGPETELIAATGGR              | 2 | 0.9998 |            |            |            |            |            |            |            |           |           |           |           |           |           |           |       |       |       |       |       |       |       |
| IPI00940335 | AKR7A2 | Putative uncharacterized protein AKR7A2                              | 1 | 9.15                          | 2 | 2      | 9,822,625  | 10,073,485 | 10,777,632 | 9,815,615  | 10,723,613 | 12,209,883 | 10,016,679 | 1,711,257 | 2,706,600 | 1,101,980 | 1,207,484 | 1,121,185 | 2,385,748 | 1,390,646 | 17.42 | 26.87 | 10.22 | 12.3  | 10.46 | 19.54 | 13.88 |
|             |        |                                                                      |   | FFGNSWAETYR                   | 2 | 0.9996 |            |            |            |            |            |            |            |           |           |           |           |           |           |           |       |       |       |       |       |       |       |
|             |        |                                                                      |   | FYAYNPLAGLLTGK                | 2 | 0.9996 |            |            |            |            |            |            |            |           |           |           |           |           |           |           |       |       |       |       |       |       |       |
| IPI00940387 | PNPO   | 13 kDa protein                                                       | 1 | 7.62                          | 1 | 1      | 1,656,018  | 1,597,335  | 1,362,495  | 1,391,230  | 1,421,153  | 1,869,000  | 1,312,453  | 219,565   | 458,023   | 99,387    | 218,037   | 339,067   | 322,840   | 272,693   | 13.26 | 28.67 | 7.29  | 15.67 | 23.86 | 17.27 | 20.78 |
|             |        |                                                                      |   | FTNFESR                       | 2 | 0.9986 |            |            |            |            |            |            |            |           |           |           |           |           |           |           |       |       |       |       |       |       |       |
| IPI00940393 | -      | Elongation factor 1-alpha                                            | 1 | 27.34                         | 7 | 7      | 13,934,065 | 13,221,446 | 11,697,393 | 11,613,208 | 11,603,507 | 13,719,093 | 11,582,368 | 902,691   | 3,348,529 | 1,172,773 | 1,202,587 | 1,130,499 | 1,822,873 | 2,299,485 | 6.48  | 25.33 | 10.03 | 10.36 | 9.74  | 13.29 | 19.85 |
|             |        |                                                                      |   | IGGIGTPVVG                    | 2 | 0.9998 |            |            |            |            |            |            |            |           |           |           |           |           |           |           |       |       |       |       |       |       |       |
|             |        |                                                                      |   | LPLQDVYK                      | 2 | 0.9982 |            |            |            |            |            |            |            |           |           |           |           |           |           |           |       |       |       |       |       |       |       |
|             |        |                                                                      |   | NMITGTSQADCAVLVAAGVGEFAGISK   | 3 | 0.8986 |            |            |            |            |            |            |            |           |           |           |           |           |           |           |       |       |       |       |       |       |       |
|             |        |                                                                      |   | QTVAVGVK                      | 2 | 0.9995 |            |            |            |            |            |            |            |           |           |           |           |           |           |           |       |       |       |       |       |       |       |
|             |        |                                                                      |   | THINIVIGHVDSGK                | 3 | 0.9997 |            |            |            |            |            |            |            |           |           |           |           |           |           |           |       |       |       |       |       |       |       |
|             |        |                                                                      |   | VETGVLPKGMVVTFAPVNVV          |   |        |            |            |            |            |            |            |            |           |           |           |           |           |           |           |       |       |       |       |       |       |       |

|             |               |                                       |       |                       |   |        |           |           |           |           |            |            |           |         |           |         |           |           |           |           |       |       |       |       |       |       |       |
|-------------|---------------|---------------------------------------|-------|-----------------------|---|--------|-----------|-----------|-----------|-----------|------------|------------|-----------|---------|-----------|---------|-----------|-----------|-----------|-----------|-------|-------|-------|-------|-------|-------|-------|
| IPI00945562 | UGP2          | Putative uncharacterized protein UGP2 | 1     | 18.63                 | 2 | 2      | 2,739,299 | 2,349,434 | 2,287,524 | 2,747,016 | 2,754,018  | 2,935,210  | 2,516,693 | 619,528 | 605,758   | 393,144 | 601,134   | 478,953   | 506,165   | 528,057   | 22.62 | 25.78 | 17.19 | 21.88 | 17.39 | 17.24 | 20.98 |
| IPI00945711 | UGP2          | Putative uncharacterized protein UGP2 | 1     | 20                    | 2 | 2      | 2,739,299 | 2,349,434 | 2,287,524 | 2,747,016 | 2,754,018  | 2,935,210  | 2,516,693 | 619,528 | 605,758   | 393,144 | 601,134   | 478,953   | 506,165   | 528,057   | 22.62 | 25.78 | 17.19 | 21.88 | 17.39 | 17.24 | 20.98 |
|             |               |                                       |       | GLPDNISSVLNK          | 2 | 0.9997 |           |           |           |           |            |            |           |         |           |         |           |           |           |           |       |       |       |       |       |       |       |
|             |               |                                       |       | NENTFLDLTVQQIEHLNK    | 3 | 0.9998 |           |           |           |           |            |            |           |         |           |         |           |           |           |           |       |       |       |       |       |       |       |
| IPI00945566 | CLTA          | 28 kDa protein                        | 1     | 7.69                  | 3 | 3      | 2,695,035 | 2,767,597 | 2,161,061 | 2,402,905 | 2,339,026  | 2,730,090  | 2,121,500 | 514,214 | 773,848   | 275,086 | 231,861   | 463,217   | 295,507   | 368,497   | 19.08 | 27.96 | 12.73 | 9.65  | 19.8  | 10.82 | 17.37 |
|             |               |                                       |       | AIKELEEWYAR           | 3 | 0.9997 |           |           |           |           |            |            |           |         |           |         |           |           |           |           |       |       |       |       |       |       |       |
|             |               |                                       |       | ELEEYWAR              | 2 | 0.9726 |           |           |           |           |            |            |           |         |           |         |           |           |           |           |       |       |       |       |       |       |       |
|             |               |                                       |       | LEALDANSR             | 2 | 0.9989 |           |           |           |           |            |            |           |         |           |         |           |           |           |           |       |       |       |       |       |       |       |
| IPI00945782 | LM2;CALM3;CAL | calmodulin isoform 2                  | 1     | 46.9                  | 4 | 5      | 9,169,888 | 9,608,629 | 9,419,587 | 9,088,529 | 10,710,267 | 12,548,105 | 9,972,684 | 688,090 | 2,586,495 | 670,738 | 1,202,833 | 1,212,198 | 2,300,815 | 1,960,110 | 7.5   | 26.92 | 7.12  | 13.23 | 11.32 | 18.34 | 19.65 |
|             |               |                                       |       | DTDSEEEIREAFR         | 3 | 0.9458 |           |           |           |           |            |            |           |         |           |         |           |           |           |           |       |       |       |       |       |       |       |
|             |               |                                       |       | EADIDGGQVNYEEFVQMMTAK | 2 | 0.9998 |           |           |           |           |            |            |           |         |           |         |           |           |           |           |       |       |       |       |       |       |       |
|             |               |                                       |       | MKDTDSEEEIREAFR       | 3 | 0.9955 |           |           |           |           |            |            |           |         |           |         |           |           |           |           |       |       |       |       |       |       |       |
|             |               |                                       |       | VFDKDGNGYISAAELR      | 2 | 0.9998 |           |           |           |           |            |            |           |         |           |         |           |           |           |           |       |       |       |       |       |       |       |
|             |               |                                       |       | VFDKDGNGYISAAELR      | 3 | 0.9997 |           |           |           |           |            |            |           |         |           |         |           |           |           |           |       |       |       |       |       |       |       |
| IPI00945930 | PLS1          | Putative uncharacterized protein PLS1 | 0.924 | 4.89                  | 1 | 1      | 2,613,055 | 2,660,825 | 2,762,740 | 2,312,355 | 2,785,425  | 2,697,795  | 2,723,405 | 189,288 | 556,891   | 621,487 | 262,626   | 772,446   | 391,207   | 368,258   | 7.24  | 20.93 | 22.5  | 11.36 | 27.73 | 14.5  | 13.52 |
|             |               |                                       |       | MINLSEPDIDER          | 2 | 0.9238 |           |           |           |           |            |            |           |         |           |         |           |           |           |           |       |       |       |       |       |       |       |
| IPI00946029 | KLC4          | Putative uncharacterized protein KLC4 | 0.994 | 11.03                 | 3 | 3      | 2,553,151 | 2,440,649 | 2,442,884 | 2,446,538 | 2,410,953  | 3,073,784  | 2,423,175 | 182,839 | 529,805   | 263,279 | 318,000   | 354,082   | 637,216   | 624,928   | 7.16  | 21.71 | 10.78 | 13    | 14.69 | 20.73 | 25.79 |
|             |               |                                       |       | HLEFLGQLR             | 2 | 0.968  |           |           |           |           |            |            |           |         |           |         |           |           |           |           |       |       |       |       |       |       |       |
|             |               |                                       |       | LSQEEILGSTR           | 2 | 0.9938 |           |           |           |           |            |            |           |         |           |         |           |           |           |           |       |       |       |       |       |       |       |
|             |               |                                       |       | LVSQGLEALR            | 2 | 0.9132 |           |           |           |           |            |            |           |         |           |         |           |           |           |           |       |       |       |       |       |       |       |
| IPI00946087 | PLS1          | Putative uncharacterized protein PLS1 | 1     | 11.76                 | 1 | 1      | 802,173   | 755,330   | 835,240   | 844,970   | 806,410    | 848,910    | 883,233   | 258,205 | 215,060   | 304,607 | 269,953   | 162,281   | 184,307   | 240,704   | 32.19 | 28.47 | 36.47 | 31.95 | 20.12 | 21.71 | 27.25 |
| IPI00947477 | PLS1          | Putative uncharacterized protein PLS1 | 1     | 11.67                 | 1 | 1      | 8         |           |           |           |            |            |           |         |           |         |           |           |           |           |       |       |       |       |       |       |       |

|             |             |                                         |   |       |   |        |           |           |           |           |           |           |           |         |           |         |         |         |         |         |       |       |       |       |       |       |       |
|-------------|-------------|-----------------------------------------|---|-------|---|--------|-----------|-----------|-----------|-----------|-----------|-----------|-----------|---------|-----------|---------|---------|---------|---------|---------|-------|-------|-------|-------|-------|-------|-------|
| IP100963924 | HNRNP1      | Putative uncharacterized protein HNRNP1 | 1 | 23.26 | 3 | 3      | 1,315,484 | 1,788,402 | 1,459,794 | 1,585,730 | 1,521,743 | 1,992,090 | 1,314,342 | 152,700 | 668,539   | 220,375 | 207,381 | 511,645 | 432,466 | 310,514 | 11.61 | 37.38 | 15.1  | 13.08 | 33.62 | 21.71 | 23.63 |
| IP100964846 | HNRNP1      | Putative uncharacterized protein HNRNP1 | 1 | 24.69 | 3 | 3      | 1,315,484 | 1,788,402 | 1,459,794 | 1,585,730 | 1,521,743 | 1,992,090 | 1,314,342 | 152,700 | 668,539   | 220,375 | 207,381 | 511,645 | 432,466 | 310,514 | 11.61 | 37.38 | 15.1  | 13.08 | 33.62 | 21.71 | 23.63 |
| IP100965435 | HNRNP1      | Putative uncharacterized protein HNRNP1 | 1 | 24.54 | 3 | 3      | 1,315,484 | 1,788,402 | 1,459,794 | 1,585,730 | 1,521,743 | 1,992,090 | 1,314,342 | 152,700 | 668,539   | 220,375 | 207,381 | 511,645 | 432,466 | 310,514 | 11.61 | 37.38 | 15.1  | 13.08 | 33.62 | 21.71 | 23.63 |
| IP100966018 | HNRNP1      | Putative uncharacterized protein HNRNP1 | 1 | 21.74 | 3 | 3      | 1,315,484 | 1,788,402 | 1,459,794 | 1,585,730 | 1,521,743 | 1,992,090 | 1,314,342 | 152,700 | 668,539   | 220,375 | 207,381 | 511,645 | 432,466 | 310,514 | 11.61 | 37.38 | 15.1  | 13.08 | 33.62 | 21.71 | 23.63 |
| IP100966932 | HNRNP1      | Putative uncharacterized protein HNRNP1 | 1 | 24.39 | 3 | 3      | 1,315,484 | 1,788,402 | 1,459,794 | 1,585,730 | 1,521,743 | 1,992,090 | 1,314,342 | 152,700 | 668,539   | 220,375 | 207,381 | 511,645 | 432,466 | 310,514 | 11.61 | 37.38 | 15.1  | 13.08 | 33.62 | 21.71 | 23.63 |
| IP100967835 | HNRNP1      | Putative uncharacterized protein HNRNP1 | 1 | 30.77 | 3 | 3      | 1,315,484 | 1,788,402 | 1,459,794 | 1,585,730 | 1,521,743 | 1,992,090 | 1,314,342 | 152,700 | 668,539   | 220,375 | 207,381 | 511,645 | 432,466 | 310,514 | 11.61 | 37.38 | 15.1  | 13.08 | 33.62 | 21.71 | 23.63 |
| IP100968132 | HNRNP1      | Putative uncharacterized protein HNRNP1 | 1 | 23.39 | 3 | 3      | 1,315,484 | 1,788,402 | 1,459,794 | 1,585,730 | 1,521,743 | 1,992,090 | 1,314,342 | 152,700 | 668,539   | 220,375 | 207,381 | 511,645 | 432,466 | 310,514 | 11.61 | 37.38 | 15.1  | 13.08 | 33.62 | 21.71 | 23.63 |
|             |             | GLPWSCSADEVQR                           |   |       | 2 | 0.9998 |           |           |           |           |           |           |           |         |           |         |         |         |         |         |       |       |       |       |       |       |       |
|             |             | HTGPNSPDNTANDGFVR                       |   |       | 3 | 0.9998 |           |           |           |           |           |           |           |         |           |         |         |         |         |         |       |       |       |       |       |       |       |
|             |             | SNNVEMDWVLK                             |   |       | 2 | 0.9998 |           |           |           |           |           |           |           |         |           |         |         |         |         |         |       |       |       |       |       |       |       |
| IP100963980 | HNRNPD      | Putative uncharacterized protein HNRNPD | 1 | 29.68 | 5 | 5      | 5,448,332 | 5,624,430 | 4,664,202 | 4,981,323 | 5,189,040 | 6,577,734 | 4,893,497 | 271,496 | 1,224,063 | 545,717 | 648,796 | 265,242 | 788,621 | 871,311 | 4.98  | 21.76 | 11.7  | 13.02 | 5.11  | 11.99 | 17.81 |
|             |             | DLKDYFSK                                |   |       | 2 | 0.8997 |           |           |           |           |           |           |           |         |           |         |         |         |         |         |       |       |       |       |       |       |       |
|             |             | FGEVVDCTLK                              |   |       | 2 | 0.9759 |           |           |           |           |           |           |           |         |           |         |         |         |         |         |       |       |       |       |       |       |       |
|             |             | FGEVVDCTLKLDPIGTGR                      |   |       | 3 | 0.9997 |           |           |           |           |           |           |           |         |           |         |         |         |         |         |       |       |       |       |       |       |       |
|             |             | GFGFVLK                                 |   |       | 2 | 0.9998 |           |           |           |           |           |           |           |         |           |         |         |         |         |         |       |       |       |       |       |       |       |
|             |             | MFIGGLSWDTTKK                           |   |       | 2 | 0.9997 |           |           |           |           |           |           |           |         |           |         |         |         |         |         |       |       |       |       |       |       |       |
| IP100964018 | SNHG4;MATR3 | Putative uncharacterized protein MATR3  | 1 | 10.47 | 1 | 1      | 589,523   | 607,750   | 536,330   | 524,875   | 610,608   | 639,507   | 541,343   | 70,040  | 57,640    | 61,396  | 79,047  | 45,398  | 107,713 | 57,679  | 11.88 | 9.48  | 11.45 | 15.06 | 7.43  | 16.84 | 10.65 |
| IP100964253 | SNHG4;MATR3 | Putative uncharacterized protein MATR3  | 1 | 7.2   | 1 | 1      | 589,523   | 607,750   | 536,330   | 524,875   | 610,608   | 639,507   | 541,343   | 70,040  | 57,640    | 61,396  | 79,047  |         |         |         |       |       |       |       |       |       |       |

|             |        |                                         |   |                             |   |        |            |            |            |            |            |            |           |           |           |         |         |           |           |           |       |       |       |       |       |       |       |
|-------------|--------|-----------------------------------------|---|-----------------------------|---|--------|------------|------------|------------|------------|------------|------------|-----------|-----------|-----------|---------|---------|-----------|-----------|-----------|-------|-------|-------|-------|-------|-------|-------|
| IPI00965193 | GNB2L1 | Putative uncharacterized protein GNB2L1 | 1 | EIEELKQELIQAEIQNGVK         | 3 | 0.9983 |            |            |            |            |            |            |           |           |           |         |         |           |           |           |       |       |       |       |       |       |       |
|             |        |                                         |   | 24.75                       | 2 | 3      | 4,873,563  | 4,726,067  | 4,589,985  | 5,320,163  | 4,484,626  | 5,256,170  | 4,324,606 | 561,574   | 1,045,569 | 371,779 | 320,928 | 352,153   | 594,419   | 923,510   | 11.52 | 22.12 | 8.1   | 6.03  | 7.85  | 11.31 | 21.35 |
|             |        |                                         |   | IIVDELKQEVISTSSK            | 2 | 0.9997 |            |            |            |            |            |            |           |           |           |         |         |           |           |           |       |       |       |       |       |       |       |
|             |        |                                         |   | IIVDELKQEVISTSSK            | 3 | 0.9997 |            |            |            |            |            |            |           |           |           |         |         |           |           |           |       |       |       |       |       |       |       |
|             |        |                                         |   | VWQVTIGTR                   | 2 | 0.9998 |            |            |            |            |            |            |           |           |           |         |         |           |           |           |       |       |       |       |       |       |       |
| IPI00965327 | SDHA   | Putative uncharacterized protein SDHA   | 1 | 4.63                        | 2 | 2      | 3,007,330  | 2,569,478  | 2,668,135  | 2,628,390  | 2,574,530  | 3,099,663  | 2,485,978 | 445,902   | 540,563   | 190,957 | 449,043 | 575,794   | 616,666   | 402,543   | 14.83 | 21.04 | 7.16  | 17.08 | 22.36 | 19.89 | 16.19 |
|             |        |                                         |   | HTLSYVVDVGTGK               | 2 | 0.9987 |            |            |            |            |            |            |           |           |           |         |         |           |           |           |       |       |       |       |       |       |       |
|             |        |                                         |   | IDEYDYSKPIQGQQK             | 3 | 0.9453 |            |            |            |            |            |            |           |           |           |         |         |           |           |           |       |       |       |       |       |       |       |
| IPI00965344 | UGDH   | 20 kDa protein                          | 1 | 24.31                       | 2 | 2      | 1,455,273  | 1,306,375  | 1,512,141  | 1,520,299  | 1,436,658  | 1,765,026  | 1,454,438 | 184,833   | 284,384   | 212,039 | 184,660 | 243,583   | 211,844   | 226,947   | 12.7  | 21.77 | 14.02 | 12.15 | 16.95 | 12    | 15.6  |
| IPI00966999 | UGDH   | 14 kDa protein                          | 1 | 33.85                       | 2 | 2      | 1,455,273  | 1,306,375  | 1,512,141  | 1,520,299  | 1,436,658  | 1,765,026  | 1,454,438 | 184,833   | 284,384   | 212,039 | 184,660 | 243,583   | 211,844   | 226,947   | 12.7  | 21.77 | 14.02 | 12.15 | 16.95 | 12    | 15.6  |
| IPI00968010 | UGDH   | 17 kDa protein                          | 1 | 28.76                       | 2 | 2      | 1,455,273  | 1,306,375  | 1,512,141  | 1,520,299  | 1,436,658  | 1,765,026  | 1,454,438 | 184,833   | 284,384   | 212,039 | 184,660 | 243,583   | 211,844   | 226,947   | 12.7  | 21.77 | 14.02 | 12.15 | 16.95 | 12    | 15.6  |
|             |        |                                         |   | INAWNSTPLPIYEPGLK           | 2 | 0.9997 |            |            |            |            |            |            |           |           |           |         |         |           |           |           |       |       |       |       |       |       |       |
|             |        |                                         |   | NLFFSTNIDDAIKEADLVFISVNTPTK | 3 | 0.9996 |            |            |            |            |            |            |           |           |           |         |         |           |           |           |       |       |       |       |       |       |       |
| IPI00965403 | ADD1   | Putative uncharacterized protein ADD1   | 1 | 6.99                        | 1 | 1      | 1,824,086  | 1,929,301  | 1,596,429  | 1,778,690  | 1,871,339  | 2,146,486  | 1,554,924 | 219,184   | 499,910   | 196,957 | 177,530 | 70,665    | 270,481   | 233,800   | 12.02 | 25.91 | 12.34 | 9.98  | 3.78  | 12.6  | 15.04 |
|             |        |                                         |   | INLQGDIVDR                  | 2 | 0.9973 |            |            |            |            |            |            |           |           |           |         |         |           |           |           |       |       |       |       |       |       |       |
| IPI00965459 | GNB2L1 | 30 kDa protein                          | 1 | 38.83                       | 7 | 8      | 12,010,153 | 11,413,828 | 10,705,047 | 11,952,431 | 10,793,065 | 12,093,298 | 9,812,013 | 1,114,976 | 2,243,769 | 749,176 | 823,510 | 1,350,539 | 1,201,658 | 1,683,778 | 9.28  | 19.66 | 7     | 6.89  | 12.51 | 9.94  | 17.16 |
|             |        |                                         |   | DGOAMLWDLNEGK               | 2 | 0.9994 |            |            |            |            |            |            |           |           |           |         |         |           |           |           |       |       |       |       |       |       |       |
|             |        |                                         |   | FSPNSSNPIIVSCGWDK           | 2 | 0.9997 |            |            |            |            |            |            |           |           |           |         |         |           |           |           |       |       |       |       |       |       |       |
|             |        |                                         |   | GHNGWVTQIATTPQFPDMILSASR    | 3 | 0.9998 |            |            |            |            |            |            |           |           |           |         |         |           |           |           |       |       |       |       |       |       |       |
|             |        |                                         |   | IIVDELKQEVISTSSK            | 2 | 0.9997 |            |            |            |            |            |            |           |           |           |         |         |           |           |           |       |       |       |       |       |       |       |
|             |        |                                         |   | IIVDELKQEVISTSSK            | 3 | 0.9997 |            |            |            |            |            |            |           |           |           |         |         |           |           |           |       |       |       |       |       |       |       |
|             |        |                                         |   | LWDLTTGTITR                 | 2 | 0.9982 |            |            |            |            |            |            |           |           |           |         |         |           |           |           |       |       |       |       |       |       |       |

|             |             |                                             |       |                              |    |        |            |            |            |            |            |            |            |           |           |           |           |           |           |           |       |       |       |       |       |       |       |      |
|-------------|-------------|---------------------------------------------|-------|------------------------------|----|--------|------------|------------|------------|------------|------------|------------|------------|-----------|-----------|-----------|-----------|-----------|-----------|-----------|-------|-------|-------|-------|-------|-------|-------|------|
| IPI00967646 | SF1         | splicing factor 1 isoform 5                 | 0.994 | 5.87                         | 3  | 3      | 1,922,763  | 1,821,324  | 1,900,390  | 1,911,584  | 1,730,364  | 2,222,632  | 1,838,344  | 175,975   | 225,210   | 106,086   | 147,366   | 248,185   | 209,168   | 265,666   | 9.15  | 12.37 | 5.58  | 7.71  | 14.34 | 9.41  | 14.45 |      |
|             |             |                                             |       | ILRPWQSSETR                  | 3  | 0.9859 |            |            |            |            |            |            |            |           |           |           |           |           |           |           |       |       |       |       |       |       |       |      |
|             |             |                                             |       | VMIPQDEYPEINFVGLLIGPR        | 2  | 0.9798 |            |            |            |            |            |            |            |           |           |           |           |           |           |           |       |       |       |       |       |       |       |      |
|             |             |                                             |       | VSDKVMIPQDEYPEINFVGLLIGPR    | 3  | 0.9684 |            |            |            |            |            |            |            |           |           |           |           |           |           |           |       |       |       |       |       |       |       |      |
| IPI00967721 | SNHG4;MATR3 | Putative uncharacterized protein MATR3      | 1     | 14.11                        | 10 | 12     | 21,763,066 | 23,219,054 | 20,976,275 | 21,130,416 | 21,800,560 | 25,576,225 | 20,501,899 | 428,544   | 5,484,880 | 2,305,931 | 1,528,264 | 2,072,266 | 3,610,054 | 3,163,264 | 1.97  | 23.62 | 10.99 | 7.23  | 9.51  | 14.11 | 15.43 |      |
|             |             |                                             |       | ALWFQGR                      | 2  | 0.8371 |            |            |            |            |            |            |            |           |           |           |           |           |           |           |       |       |       |       |       |       |       |      |
|             |             |                                             |       | DLSAAGIGLLAAATQSLMPASLGR     | 2  | 0.9998 |            |            |            |            |            |            |            |           |           |           |           |           |           |           |       |       |       |       |       |       |       |      |
|             |             |                                             |       | DLSAAGIGLLAAATQSLMPASLGR     | 3  | 0.9998 |            |            |            |            |            |            |            |           |           |           |           |           |           |           |       |       |       |       |       |       |       |      |
|             |             |                                             |       | GDADQASNILASFGLSAR           | 2  | 0.9998 |            |            |            |            |            |            |            |           |           |           |           |           |           |           |       |       |       |       |       |       |       |      |
|             |             |                                             |       | GPGPLQER                     | 2  | 0.9761 |            |            |            |            |            |            |            |           |           |           |           |           |           |           |       |       |       |       |       |       |       |      |
|             |             |                                             |       | ITPENLPQILLQLK               | 2  | 0.9996 |            |            |            |            |            |            |            |           |           |           |           |           |           |           |       |       |       |       |       |       |       |      |
|             |             |                                             |       | RTEEGPTLSYGR                 | 2  | 0.9997 |            |            |            |            |            |            |            |           |           |           |           |           |           |           |       |       |       |       |       |       |       |      |
|             |             |                                             |       | SFQQSSLSR                    | 2  | 0.9995 |            |            |            |            |            |            |            |           |           |           |           |           |           |           |       |       |       |       |       |       |       |      |
|             |             |                                             |       | SQAFIEMETR                   | 2  | 0.9996 |            |            |            |            |            |            |            |           |           |           |           |           |           |           |       |       |       |       |       |       |       |      |
|             |             |                                             |       | TEEGPTLSYGR                  | 2  | 0.9408 |            |            |            |            |            |            |            |           |           |           |           |           |           |           |       |       |       |       |       |       |       |      |
|             |             |                                             |       | VVHIMDFQR                    | 2  | 0.8065 |            |            |            |            |            |            |            |           |           |           |           |           |           |           |       |       |       |       |       |       |       |      |
|             |             |                                             |       | VVHIMDFQR                    | 3  | 0.9998 |            |            |            |            |            |            |            |           |           |           |           |           |           |           |       |       |       |       |       |       |       |      |
| IPI00967792 | GNB2L1      | Putative uncharacterized protein GNB2L1     | 1     | 32.71                        | 6  | 7      | 14,665,799 | 14,151,628 | 13,090,515 | 14,980,265 | 12,573,513 | 15,775,595 | 12,384,313 | 971,600   | 3,299,007 | 1,430,586 | 1,950,234 | 1,368,306 | 5,252,606 | 2,572,071 | 6.62  | 23.31 | 10.93 | 13.02 | 10.88 | 33.3  | 20.77 |      |
|             |             |                                             |       | DETNYGIPQR                   | 2  | 0.9995 |            |            |            |            |            |            |            |           |           |           |           |           |           |           |       |       |       |       |       |       |       |      |
|             |             |                                             |       | FSPNSSNPIIVSCGWDK            | 2  | 0.9997 |            |            |            |            |            |            |            |           |           |           |           |           |           |           |       |       |       |       |       |       |       |      |
|             |             |                                             |       | GHNGWVTQIATTQFPDMILSASR      | 3  | 0.9998 |            |            |            |            |            |            |            |           |           |           |           |           |           |           |       |       |       |       |       |       |       |      |
|             |             |                                             |       | IIVDELKQEVISTSSK             | 2  | 0.9997 |            |            |            |            |            |            |            |           |           |           |           |           |           |           |       |       |       |       |       |       |       |      |
|             |             |                                             |       | IIVDELKQEVISTSSK             | 3  | 0.9997 |            |            |            |            |            |            |            |           |           |           |           |           |           |           |       |       |       |       |       |       |       |      |
|             |             |                                             |       | VWQVTIGTR                    | 2  | 0.9998 |            |            |            |            |            |            |            |           |           |           |           |           |           |           |       |       |       |       |       |       |       |      |
|             |             |                                             |       | YWLCAATGPSIK                 | 2  | 0.9997 |            |            |            |            |            |            |            |           |           |           |           |           |           |           |       |       |       |       |       |       |       |      |
| IPI00969395 | DDX5        | Putative uncharacterized protein (Fragment) | 1     | 12.04                        | 5  | 5      | 10,563,362 | 10,234,535 | 8,023,765  | 9,480,294  | 9,622,337  | 11,032,144 | 9,583,997  | 385,551   | 2,691,746 | 1,011,316 | 711,482   | 1,720,065 | 1,094,106 | 1,924,573 | 3.65  | 26.3  | 12.6  | 7.5   | 17.88 | 9.92  | 20.08 |      |
|             |             |                                             |       | APILIATDVASR                 | 2  | 0.9998 |            |            |            |            |            |            |            |           |           |           |           |           |           |           |       |       |       |       |       |       |       |      |
|             |             |                                             |       | MLDMGFEPQIR                  | 2  | 0.9996 |            |            |            |            |            |            |            |           |           |           |           |           |           |           |       |       |       |       |       |       |       |      |
|             |             |                                             |       | NFYQEHPDLAR                  | 3  | 0.9955 |            |            |            |            |            |            |            |           |           |           |           |           |           |           |       |       |       |       |       |       |       |      |
|             |             |                                             |       | QTLMWSATWPK                  | 2  | 0.9996 |            |            |            |            |            |            |            |           |           |           |           |           |           |           |       |       |       |       |       |       |       |      |
|             |             |                                             |       | STCIYGGAPK                   | 2  | 0.9997 |            |            |            |            |            |            |            |           |           |           |           |           |           |           |       |       |       |       |       |       |       |      |
| IPI00970897 | EEF1A1      | Elongation factor 1-alpha (Fragment)        | 1     | 24.88                        | 8  | 9      | 38,120,144 | 36,443,793 | 35,966,604 | 32,881,142 | 34,877,369 | 37,047,895 | 33,143,463 | 4,152,168 | 8,825,213 | 3,375,957 | 5,689,327 | 6,699,386 | 5,259,725 | 3,910,034 | 10.89 | 24.22 | 9.39  | 17.3  | 19.21 | 14.2  | 11.8  |      |
|             |             |                                             |       | DGNASGTTLLEALDCILPPHSPTDKPLR | 3  | 0.9984 |            |            |            |            |            |            |            |           |           |           |           |           |           |           |       |       |       |       |       |       |       |      |
|             |             |                                             |       | IGGIGTVPVGR                  | 2  | 0.9998 |            |            |            |            |            |            |            |           |           |           |           |           |           |           |       |       |       |       |       |       |       |      |
|             |             |                                             |       | LPLQDVYK                     | 2  | 0.9982 |            |            |            |            |            |            |            |           |           |           |           |           |           |           |       |       |       |       |       |       |       |      |
|             |             |                                             |       | QLIVGVNK                     | 2  | 0.9644 |            |            |            |            |            |            |            |           |           |           |           |           |           |           |       |       |       |       |       |       |       |      |
|             |             |                                             |       | QTVAVGVK                     | 2  | 0.9995 |            |            |            |            |            |            |            |           |           |           |           |           |           |           |       |       |       |       |       |       |       |      |
|             |             |                                             |       | VETGVLKPGMVVTFAPVNVVTEVK     | 2  | 0.9998 |            |            |            |            |            |            |            |           |           |           |           |           |           |           |       |       |       |       |       |       |       |      |
|             |             |                                             |       | VETGVLKPGMVVTFAPVNVVTEVK     | 3  | 0.9998 |            |            |            |            |            |            |            |           |           |           |           |           |           |           |       |       |       |       |       |       |       |      |
|             |             |                                             |       | YEEIVK                       | 2  | 0.9931 |            |            |            |            |            |            |            |           |           |           |           |           |           |           |       |       |       |       |       |       |       |      |
|             |             |                                             |       | YVVTIIDAPGHR                 | 3  | 0.9998 |            |            |            |            |            |            |            |           |           |           |           |           |           |           |       |       |       |       |       |       |       |      |
|             |             |                                             |       |                              |    |        |            |            |            |            |            |            |            |           |           |           |           |           |           |           | Mean  | 12.4  | 25.6  | 15.3  | 15.8  | 17.1  | 16.8  | 21.5 |
