# Supplementary material
Source: PubMed Central journal article supplement (PMC3822612)
Supplement: NIHMS516529-supplement-Supplementary_Table_2.pdf [file NIHMS516529-supplement-Supplementary_Table_2.pdf]

Supplemental Table 2. Top 50 Proteins by Quantity - Caco-2/HT29-MTXCo-culture

| Protein ID  | Gene Name | Protein Name                                        | Control Abundance | SDEV       | SDEV % |
|-------------|-----------|-----------------------------------------------------|-------------------|------------|--------|
| IPI00554648 | KRT8      | Keratin, type II cytoskeletal 8                     | 1,109,744,830     | 39,799,547 | 3.6%   |
| IPI00465248 | ENO1      | Enolase, alpha                                      | 1,025,441,415     | 43,454,375 | 4.2%   |
| IPI00022977 | CKB       | Creatine kinase B-type                              | 988,761,683       | 64,399,496 | 6.5%   |
| IPI00169383 | PGK1      | Phosphoglycerate kinase 1                           | 897,540,873       | 22,509,761 | 2.5%   |
| IPI00021812 | AHNAK     | Neuroblast differentiation-associated protein AHNAK | 792,333,610       | 26,734,897 | 3.4%   |
| IPI00219018 | GAPDH     | Glyceraldehyde-3-phosphate dehydrogenase            | 662,541,090       | 27,337,972 | 4.1%   |
| IPI00479145 | KRT19     | Keratin, type I cytoskeletal 19                     | 522,075,269       | 14,485,113 | 2.8%   |
| IPI00419585 | PPIA      | Peptidyl-prolyl cis-trans isomerase A               | 422,880,015       | 17,277,660 | 4.1%   |
| IPI00103397 | MUC5AC    | Mucin-5AC                                           | 415,235,715       | 4,585,842  | 1.1%   |
| IPI00219757 | GSTP1     | Glutathione S-transferase P                         | 393,685,490       | 25,188,634 | 6.4%   |
| IPI00013808 | ACTN4     | Alpha-actinin-4                                     | 374,808,100       | 16,404,668 | 4.4%   |
| IPI00479186 | PKM2      | Pyruvate kinase isozymes M2                         | 373,908,919       | 24,759,878 | 6.6%   |
| IPI00554788 | KRT18     | Keratin, type I cytoskeletal 18                     | 370,773,478       | 12,703,726 | 3.4%   |
| IPI00784154 | HSPD1     | 60 kDa heat shock protein, mitochondrial            | 368,237,439       | 13,170,694 | 3.6%   |
| IPI00022774 | VCP       | Transitional endoplasmic reticulum ATPase           | 355,436,528       | 15,012,135 | 4.2%   |
| IPI00465028 | TPI1      | Triosephosphate isomerase, isoform 2                | 341,477,130       | 11,208,619 | 3.3%   |
| IPI00025252 | PDIA3     | Protein disulfide-isomerase A3                      | 341,066,770       | 9,031,311  | 2.6%   |
| IPI00218343 | TUBA1C    | Tubulin alpha-1C chain                              | 328,621,976       | 9,174,659  | 2.8%   |
| IPI00027230 | HSP90B1   | Endoplasmic                                         | 327,546,080       | 14,612,633 | 4.5%   |
| IPI00021405 | LMNA      | Prelamin-A                                          | 319,160,050       | 13,217,964 | 4.1%   |
| IPI00844215 | SPTAN1    | Spectrin alpha chain, brain, Isoform 1              | 287,044,894       | 15,429,664 | 5.4%   |
| IPI00005614 | SPTBN1    | Spectrin beta chain, brain 1, Isoform Long          | 277,670,388       | 13,240,940 | 4.8%   |
| IPI00843765 | SPTAN1    | Spectrin alpha chain, brain, Isoform 3              | 276,045,715       | 14,865,564 | 5.4%   |
| IPI00003362 | HSPA5     | 78 kDa glucose-regulated protein                    | 273,989,400       | 8,094,877  | 3.0%   |
| IPI00465431 | LGALS3    | Galectin-3                                          | 270,753,570       | 10,342,906 | 3.8%   |
| IPI00023006 | ACTC1     | Actin, alpha cardiac muscle 1                       | 266,485,403       | 15,125,548 | 5.7%   |
| IPI00026781 | FASN      | Fatty acid synthase                                 | 259,706,760       | 14,142,045 | 5.4%   |
| IPI00024821 | PSMD14    | 26S proteasome non-ATPase regulatory subunit 14     | 247,973,936       | 25,425,800 | 10.3%  |
| IPI00012011 | CFL1      | Cofilin-1                                           | 245,204,510       | 16,276,102 | 6.6%   |
| IPI00220301 | PRDX6     | Peroxiredoxin-6                                     | 240,887,842       | 8,390,800  | 3.5%   |
| IPI00414676 | HSP90AB1  | Heat shock protein HSP 90-beta                      | 233,919,782       | 11,655,172 | 5.0%   |
| IPI00021298 | KRT20     | Keratin, type I cytoskeletal 20                     | 227,288,819       | 11,818,014 | 5.2%   |
| IPI00019502 | MYH9      | Myosin-9, Isoform 1                                 | 224,866,795       | 14,753,219 | 6.6%   |
| IPI00027223 | IDH1      | Isocitrate dehydrogenase [NADP] cytoplasmic         | 213,886,430       | 25,662,630 | 12.0%  |
| IPI00645452 | TUBB      | Tubulin, beta                                       | 210,354,145       | 10,787,591 | 5.1%   |
| IPI00299571 | PDIA6     | Protein disulfide-isomerase A6, Isoform 2           | 210,140,330       | 34,133,570 | 16.2%  |
| IPI00550069 | RNH1      | Ribonuclease inhibitor                              | 206,063,048       | 9,713,385  | 4.7%   |
| IPI00645078 | UBA1      | Ubiquitin-like modifier-activating enzyme 1         | 205,411,720       | 13,766,775 | 6.7%   |
| IPI00010796 | P4HB      | Protein disulfide-isomerase                         | 204,427,035       | 9,883,232  | 4.8%   |
| IPI00004358 | PYGB      | Glycogen phosphorylase, brain form                  | 202,957,172       | 15,623,248 | 7.7%   |
| IPI00216691 | PFN1      | Profilin-1                                          | 195,064,314       | 12,248,759 | 6.3%   |
| IPI00027444 | SERPINB1  | Leukocyte elastase inhibitor                        | 190,334,475       | 8,102,119  | 4.3%   |
| IPI00871535 | SPTAN1    | Spectrin alpha chain, brain, Isoform 2              | 187,295,669       | 9,250,601  | 4.9%   |
| IPI00010706 | GSS       | Glutathione synthetase                              | 177,710,865       | 11,152,458 | 6.3%   |
| IPI00027463 | S100A6    | Protein S100-A6 (Calcyclin)                         | 173,149,089       | 14,250,326 | 8.2%   |
| IPI00220834 | XRCC5     | X-ray repair cross-complementing protein 5          | 170,399,642       | 14,652,798 | 8.6%   |
| IPI00218852 | VIL1      | Villin-1                                            | 163,322,409       | 8,005,813  | 4.9%   |
| IPI00010290 | FABP1     | Fatty acid-binding protein, liver                   | 160,509,380       | 4,834,382  | 3.0%   |
| IPI00444262 | NCL       | Nucleolin                                           | 150,716,852       | 6,084,296  | 4.0%   |
| IPI00220271 | AKR1A1    | Alcohol dehydrogenase [NADP+]                       | 149,368,390       | 4,266,998  | 2.9%   |
