# Supplementary material
Source: PubMed Central journal article supplement (PMC3822612)
Supplement: NIHMS516529-supplement-Supplementary_Table_3.pdf [file NIHMS516529-supplement-Supplementary_Table_3.pdf]

Supplemental Table 3. SWCNT-COOH 500 pg/mL - Differentially Expressed Proteins

| Protein ID  | Gene Name | Protein Name                                         | Fold Change | Multiple Comparison p |
|-------------|-----------|------------------------------------------------------|-------------|-----------------------|
| IPI00289499 | ATIC      | Bifunctional purine biosynthesis protein PURH        | -1.2        | 0.03                  |
| IPI00016910 | EIF3C     | Eukaryotic translation initiation factor 3 subunit C | -1.2        | 0.04                  |
| IPI00002922 | TBL1XR1   | F-box-like/WD repeat-containing protein TBL1XR1      | -1.5        | 0.001                 |
| IPI00412406 | HMGXB4    | High-mobility group protein 2-like 1                 | -1.5        | 0.02                  |
| IPI00027255 | MYL6B     | Myosin light chain 6B                                | -1.4        | 0.05                  |
| IPI00171741 | PGBD4     | PiggyBac transposable element-derived protein 4      | -1.5        | 0.008                 |
| IPI00443909 | CNPY2     | Protein canopy homolog 2, isoform 1                  | -1.3        | 0.03                  |
| IPI00908505 | SCRN1     | Secernin 1                                           | -1.4        | 0.02                  |
| IPI00005914 | SHPK      | Sedoheptulokinase                                    | -1.5        | 0.01                  |
| IPI00334190 | STOML2    | Stomatin-like protein 2                              | -1.3        | 0.01                  |
| IPI00395694 | TNPO3     | Transportin-3, isoform 2                             | -1.5        | 0.009                 |
| IPI00221178 | TPD52L2   | Tumor protein D54, isoform 2                         | -1.4        | 0.003                 |
| IPI00647442 | VDAC2     | Voltage-dependent anion channel 2                    | -1.4        | 0.04                  |
