# Supplementary material
Source: PubMed Central journal article supplement (PMC3822612)
Supplement: NIHMS516529-supplement-Supplementary_Table_4.pdf [file NIHMS516529-supplement-Supplementary_Table_4.pdf]

Supplemental Table 4. SWCNT-COOH 10 ug/mL - Differentially Expressed Proteins

| Protein ID  | Gene Name    | Protein Name                                                            | Fold Change<br>10ug | Multiple<br>Comparison p | ANOVA<br>p value | Q value |
|-------------|--------------|-------------------------------------------------------------------------|---------------------|--------------------------|------------------|---------|
| IPI00386083 | NT5C         | 5'(3')-deoxyribonucleotidase, cytosolic type, isoform 2                 | -1.4                | 0.003                    | 0.01             | 0.04    |
| IPI00784154 | HSPD1        | 60 kDa heat shock protein, mitochondrial                                | -1.1                | 0.02                     | 0.01             | 0.10    |
| IPI00470528 | RPL15        | 60S ribosomal protein L15                                               | -1.6                | 0.003                    | 0.00006          | 0.04    |
| IPI00010153 | RPL23        | 60S ribosomal protein L23                                               | -1.3                | 0.03                     | 0.01             | 0.13    |
| IPI00219155 | RPL27        | 60S ribosomal protein L27                                               | -1.4                | 0.03                     | 0.001            | 0.13    |
| IPI00028091 | ACTR3        | Actin-related protein 3                                                 | -1.3                | 0.0003                   | 0.0003           | 0.02    |
| IPI00215917 | ARF3         | ADP-ribosylation factor 3                                               | -1.2                | 0.03                     | 0.01             | 0.12    |
| IPI00032179 | SERPINC1     | Antithrombin-III                                                        | -1.1                | 0.02                     | 0.004            | 0.11    |
| IPI00027178 | AP1G2        | AP-1 complex subunit gamma-like 2                                       | 1.9                 | 0.007                    | 0.001            | 0.07    |
| IPI00304409 | CARHSP1      | Calcium-regulated heat stable protein 1                                 | -1.2                | 0.04                     | 0.01             | 0.15    |
| IPI00099670 | CEL          | Carboxyl ester lipase precursor                                         | -1.7                | 0.0009                   | 0.0009           | 0.03    |
| IPI00011284 | COMT         | Catechol O-methyltransferase, isoform Membrane-bound                    | -1.2                | 0.01                     | 0.01             | 0.08    |
| IPI00216088 | CRABP2       | Cellular retinoic acid-binding protein 2                                | -1.2                | 0.03                     | 0.005            | 0.13    |
| IPI00790808 | COPZ1        | Coatomer protein complex, subunit zeta 1                                | -1.3                | 0.0003                   | 0.0007           | 0.02    |
| IPI00012011 | CFL1         | Cofilin-1                                                               | -1.2                | 0.004                    | 0.003            | 0.04    |
| IPI00442073 | CSRP1        | Cysteine and glycine-rich protein 1                                     | -1.1                | 0.01                     | 0.000009         | 0.08    |
| IPI00384282 | EZR          | Cytovillin 2 (Fragment)                                                 | 1.2                 | 0.05                     | 0.01             | 0.16    |
| IPI00921830 | DBI          | Diazepam binding inhibitor (GABA receptor modulator, acyl-CoA binding p | -1.1                | 0.04                     | 0.0001           | 0.15    |
| IPI00296141 | DPP7         | Dipeptidyl peptidase 2                                                  | -1.1                | 0.01                     | 0.01             | 0.08    |
| IPI00924974 | DPP4         | Dipeptidyl-peptidase 4                                                  | -1.7                | 0.02                     | 0.003            | 0.10    |
| IPI00795769 | DNAJA2       | DnaJ (Hsp40) homolog, subfamily A, member 2                             | -1.3                | 0.04                     | 0.005            | 0.15    |
| IPI00018798 | DNAJC17      | DnaJ homolog subfamily C member 17                                      | -1.3                | 0.002                    | 0.0005           | 0.04    |
| IPI00003084 | DRAP1        | Dr1-associated corepressor, isoform 1                                   | -1.3                | 0.004                    | 0.01             | 0.04    |
| IPI00033022 | DNM2         | Dynamin-2, isoform 1                                                    | -1.2                | 0.0009                   | 0.009            | 0.03    |
| IPI00940393 | EEF1A1       | Elongation factor 1-alpha                                               | -1.2                | 0.02                     | 0.007            | 0.10    |
| IPI00025447 | EEF1A1       | Elongation factor 1-alpha                                               | -1.2                | 0.03                     | 0.009            | 0.12    |
| IPI00178440 | EEF1B2       | Elongation factor 1-beta                                                | -1.2                | 0.03                     | 0.006            | 0.12    |
| IPI00029631 | ERH          | Enhancer of rudimentary homolog                                         | -1.3                | 0.04                     | 0.01             | 0.15    |
| IPI00009328 | EIF4A3       | Eukaryotic initiation factor 4A-III                                     | -1.2                | 0.01                     | 0.006            | 0.08    |
| IPI00016910 | EIF3C;EIF3CL | Eukaryotic translation initiation factor 3 subunit C                    | -1.2                | 0.02                     | 0.009            | 0.11    |
| IPI00033143 | EIF3K        | Eukaryotic translation initiation factor 3 subunit K                    | -1.3                | 0.02                     | 0.008            | 0.10    |
| IPI00654777 | EIF3F        | Eukaryotic translation initiation factor 3, subunit F                   | -1.4                | 0.0003                   | 0.0006           | 0.02    |
| IPI00855924 | EIF5A1;EIF5A | Eukaryotic translation initiation factor 5A-1-like                      | -1.2                | 0.004                    | 0.006            | 0.04    |
| IPI00010290 | FABP1        | FABP1 protein (Fragment)                                                | -1.1                | 0.007                    | 0.002            | 0.06    |

|             |            |                                                                               |      |        |          |      |
|-------------|------------|-------------------------------------------------------------------------------|------|--------|----------|------|
| IPI00002922 | TBL1XR1    | F-box-like/WD repeat-containing protein TBL1XR1                               | -1.4 | 0.005  | 0.0002   | 0.06 |
| IPI00940093 | FLNB       | Filamin-B, isoform 7                                                          | -1.2 | 0.01   | 0.01     | 0.08 |
| IPI00418262 | ALDOC      | Fructose-bisphosphate aldolase                                                | -1.1 | 0.02   | 0.002    | 0.11 |
| IPI00383900 | RNASEH1    | Gastric cancer-related protein GCYS-20                                        | -2.1 | 0.001  | 0.00002  | 0.03 |
| IPI00216159 | GFPT2      | Glucosamine--fructose-6-phosphate aminotransferase [isomerizing] 2            | 1.7  | 0.002  | 0.000004 | 0.04 |
| IPI00027146 | GLUD2      | Glutamate dehydrogenase 2, mitochondrial                                      | -1.2 | 0.008  | 0.008    | 0.07 |
| IPI00909080 | GPD1       | Glycerol-3-phosphate dehydrogenase                                            | 1.4  | 0.006  | 0.001    | 0.06 |
| IPI00556561 | RHEBL1     | GTPase RhebL1, isoform 2                                                      | -1.3 | 0.003  | 0.006    | 0.04 |
| IPI00924758 | GNB2       | Guanine nucleotide-binding protein G(I)/G(S)/G(T) subunit beta-2, variant     | -1.2 | 0.003  | 0.002    | 0.04 |
| IPI00003348 | GNB2       | Guanine nucleotide-binding protein G(I)/G(S)/G(T) subunit beta-2, variant     | -1.2 | 0.01   | 0.008    | 0.08 |
| IPI00106509 | HNRNPAB    | Heterogeneous nuclear ribonucleoprotein A/B, isoform 4                        | -1.2 | 0.02   | 0.005    | 0.11 |
| IPI00963980 | HNRNPD     | Heterogeneous nuclear ribonucleoprotein D (AU-rich element RNA binding        | -1.1 | 0.05   | 0.002    | 0.20 |
| IPI00465225 | HNRNPL     | heterogeneous nuclear ribonucleoprotein L isoform b                           | -1.2 | 0.02   | 0.001    | 0.10 |
| IPI00027834 | HNRNPL     | Heterogeneous nuclear ribonucleoprotein L, variant                            | -1.1 | 0.04   | 0.004    | 0.15 |
| IPI00412406 | HMGXB4     | High-mobility group protein 2-like 1                                          | -1.4 | 0.04   | 0.01     | 0.15 |
| IPI00216456 | HIST1H2AC  | Histone H2A type 1-C                                                          | 1.5  | 0.004  | 0.0004   | 0.04 |
| IPI00216457 | HIST2H2AA4 | Histone H2A type 2-A                                                          | 1.6  | 0.008  | 0.0002   | 0.07 |
| IPI00220855 | H2AFJ      | Histone H2A.J, isoform 1                                                      | 1.8  | 0.005  | 0.00003  | 0.06 |
| IPI00018278 | H2AFV      | Histone H2A.V                                                                 | 1.6  | 0.002  | 0.0001   | 0.04 |
| IPI00219037 | H2AFX      | Histone H2A.x                                                                 | 1.5  | 0.02   | 0.002    | 0.11 |
| IPI00220403 | HIST1H2BB  | Histone H2B type 1-B                                                          | 1.7  | 0.0003 | 0.00003  | 0.02 |
| IPI00477495 | H2BFS      | Histone H2B type F-S                                                          | 1.7  | 0.0004 | 0.00004  | 0.02 |
| IPI00219038 | H3F3A      | Histone H3.3                                                                  | 1.5  | 0.04   | 0.01     | 0.14 |
| IPI00792333 | IBTK       | Inhibitor of Bruton tyrosine kinase, isoform 1                                | 1.3  | 0.006  | 0.002    | 0.06 |
| IPI00010697 | ITGA6      | Integrin alpha-6, isoform Alpha-6X1X2B                                        | -1.3 | 0.02   | 0.009    | 0.12 |
| IPI00873066 | PAFAH1B2   | Intracellular platelet-activating factor acetylhydrolase alpha 2 subunit vari | -1.3 | 0.02   | 0.004    | 0.10 |
| IPI00554788 | KRT18      | Keratin, type I cytoskeletal 18                                               | -1.2 | 0.01   | 0.01     | 0.08 |
| IPI00299145 | KRT6C      | Keratin, type II cytoskeletal 6C                                              | -1.2 | 0.009  | 0.002    | 0.08 |
| IPI00329482 | LAMA4      | Laminin subunit alpha-4, isoform 1                                            | 1.4  | 0.01   | 0.004    | 0.08 |
| IPI00218847 | ACP1       | Low molecular weight phosphotyrosine protein phosphatase, isoform 2           | -1.2 | 0.04   | 0.01     | 0.15 |
| IPI00293276 | MIF        | Macrophage migration inhibitory factor                                        | 1.9  | 0.0004 | 0.00004  | 0.02 |
| IPI00927864 | MDH2       | Malate dehydrogenase                                                          | -1.2 | 0.03   | 0.001    | 0.12 |
| IPI00219365 | MSN        | Moesin                                                                        | 1.2  | 0.05   | 0.01     | 0.19 |
| IPI00103397 | MUC5AC     | Mucin-5AC                                                                     | -1.2 | 0.03   | 0.006    | 0.13 |
| IPI00918002 | MUC5B      | Mucin-5B                                                                      | -1.5 | 0.04   | 0.007    | 0.15 |
| IPI00796366 | MYL6       | Myosin, light chain 6, alkali, smooth muscle and non-muscle                   | -1.2 | 0.02   | 0.01     | 0.09 |

|             |          |                                                                          |      |        |        |      |
|-------------|----------|--------------------------------------------------------------------------|------|--------|--------|------|
| IPI00413922 | MYL6B    | Myosin, light chain 6B, alkali, smooth muscle and non-muscle             | -1.1 | 0.05   | 0.01   | 0.21 |
| IPI00926178 | MTPN     | Myotrophin                                                               | -1.2 | 0.01   | 0.005  | 0.08 |
| IPI00026167 | NHP2L1   | NHP2-like protein 1                                                      | -1.3 | 0.007  | 0.005  | 0.07 |
| IPI00012450 | NMI      | N-myc-interactor                                                         | 1.6  | 0.001  | 0.01   | 0.04 |
| IPI00376904 | NSFL1C   | NSFL1 cofactor p47 isoform c                                             | -1.3 | 0.03   | 0.006  | 0.13 |
| IPI00100197 | NSFL1C   | NSFL1 cofactor p47, isoform 1                                            | -1.3 | 0.01   | 0.006  | 0.08 |
| IPI00795292 | NME2     | Nucleoside diphosphate kinase B, isoform 3                               | -1.2 | 0.01   | 0.009  | 0.08 |
| IPI00169383 | PGK1     | Phosphoglycerate kinase 1                                                | -1.2 | 0.005  | 0.0002 | 0.06 |
| IPI00219568 | PGK2     | Phosphoglycerate kinase 2                                                | -1.1 | 0.05   | 0.0008 | 0.16 |
| IPI00026546 | PAFAH1B2 | Platelet-activating factor acetylhydrolase IB subunit beta               | -1.2 | 0.004  | 0.006  | 0.04 |
| IPI00790842 | PABPC1   | Poly(A) binding protein, cytoplasmic 1, variant                          | -1.2 | 0.009  | 0.003  | 0.07 |
| IPI00909378 | PABPC1   | Poly(A) binding protein, cytoplasmic 1, variant                          | -1.2 | 0.02   | 0.005  | 0.10 |
| IPI00788837 | PCBP2    | Poly(rC) binding protein 2, variant                                      | -1.3 | 0.0009 | 0.0009 | 0.03 |
| IPI00012066 | PCBP2    | Poly(rC)-binding protein 2, isoform b                                    | -1.2 | 0.0002 | 0.0007 | 0.02 |
| IPI00301154 | PABPC3   | Polyadenylate-binding protein 3                                          | -1.2 | 0.007  | 0.002  | 0.07 |
| IPI00880097 | POLR2J   | Polymerase (RNA) II (DNA directed) polypeptide J, 13.3kDa                | -1.7 | 0.001  | 0.0005 | 0.03 |
| IPI00744835 | PSAP     | Proactivator polypeptide, isoform Sap-mu-9                               | -1.3 | 0.007  | 0.008  | 0.06 |
| IPI00246058 | PDCD6IP  | Programmed cell death 6-interacting protein                              | -1.2 | 0.002  | 0.0001 | 0.04 |
| IPI00298547 | PARK7    | Protein DJ-1                                                             | -1.1 | 0.02   | 0.006  | 0.11 |
| IPI00019997 | LIN7C    | Protein lin-7 homolog C                                                  | 1.2  | 0.006  | 0.007  | 0.06 |
| IPI00030355 | PPP1R11  | Protein phosphatase 1 regulatory subunit 11                              | -1.3 | 0.02   | 0.003  | 0.09 |
| IPI00335061 | PYCR2    | Pyrroline-5-carboxylate reductase family, member 2                       | 1.4  | 0.02   | 0.006  | 0.11 |
| IPI00550069 | RNH1     | Ribonuclease inhibitor                                                   | -1.2 | 0.005  | 0.0001 | 0.06 |
| IPI00397676 | RPL7A    | Ribosomal protein L7a                                                    | -1.2 | 0.02   | 0.009  | 0.09 |
| IPI00793137 | RPSAP58  | Ribosomal protein SA pseudogene 58                                       | -1.2 | 0.03   | 0.01   | 0.13 |
| IPI00797741 | RPLP0    | Ribosomal protein, large, P0, variant                                    | -1.3 | 0.007  | 0.0006 | 0.06 |
| IPI00215743 | RRBP1    | Ribosome-binding protein 1, isoform 3                                    | -1.2 | 0.001  | 0.0004 | 0.03 |
| IPI00556485 | RPLP0    | RPLP0 protein                                                            | -1.2 | 0.02   | 0.004  | 0.10 |
| IPI00908505 | SCRN1    | Secernin 1                                                               | -1.3 | 0.04   | 0.009  | 0.14 |
| IPI00003377 | SRSF7    | Serine/arginine-rich splicing factor 7, isoform 1                        | 1.5  | 0.02   | 0.004  | 0.10 |
| IPI00943308 | SRSF7    | Serine/arginine-rich splicing factor 7, variant                          | 1.4  | 0.003  | 0.0008 | 0.04 |
| IPI00027423 | PPP1CA   | serine/threonine-protein phosphatase PP1-alpha catalytic subunit isoform | -1.2 | 0.05   | 0.004  | 0.15 |
| IPI00032134 | SERPINB8 | Serpin B8                                                                | -1.1 | 0.04   | 0.0002 | 0.13 |
| IPI00917346 | SRSF7    | Splicing factor, arginine/serine-rich 7                                  | 1.4  | 0.002  | 0.0005 | 0.04 |
| IPI00019407 | NSDHL    | Sterol-4-alpha-carboxylate 3-dehydrogenase, decarboxylating              | 1.4  | 0.02   | 0.001  | 0.09 |
| IPI00164300 | SUCLG2   | Succinyl-CoA ligase (GDP-forming) subunit beta, mitochondrial pseudogen  | -1.4 | 0.0006 | 0.001  | 0.03 |

|             |         |                                     |      |        |         |      |
|-------------|---------|-------------------------------------|------|--------|---------|------|
| IPI00300027 | SULT1A2 | Sulfotransferase 1A2                | 1.2  | 0.03   | 0.002   | 0.13 |
| IPI00216298 | TXN     | Thioredoxin                         | -1.1 | 0.05   | 0.01    | 0.16 |
| IPI00220827 | TMSB10  | Thymosin beta-10                    | -1.2 | 0.007  | 0.007   | 0.07 |
| IPI00644531 | TAGLN2  | Transgelin-2, variant or isoform    | -1.2 | 0.003  | 0.00004 | 0.04 |
| IPI00550363 | TAGLN2  | Transgelin-2, variant or isoform    | -1.2 | 0.01   | 0.00005 | 0.08 |
| IPI00395694 | TNPO3   | Transportin-3, isoform 2            | -1.4 | 0.02   | 0.003   | 0.09 |
| IPI00465028 | TPI1    | Triosephosphate isomerase isoform 2 | -1.3 | 0.0007 | 0.00009 | 0.03 |
| IPI00018511 | TUBB4Q  | Tubulin beta-4q chain               | -1.8 | 0.003  | 0.002   | 0.04 |
| IPI00619958 | TPD52   | Tumor protein D52, isoform 1        | -1.2 | 0.03   | 0.01    | 0.13 |
| IPI00550917 | TWF2    | Twinfilin-2                         | -1.2 | 0.02   | 0.001   | 0.10 |
| IPI00908612 | VAR5    | Valyl-tRNA synthetase               | -1.2 | 0.001  | 0.009   | 0.03 |
| IPI00647442 | VDAC2   | Voltage-dependent anion channel 2   | -1.4 | 0.04   | 0.007   | 0.14 |
