# Supplementary material
Source: PubMed Central journal article supplement (PMC3822612)
Supplement: NIHMS516529-supplement-Supplementary_Table_5.pdf [file NIHMS516529-supplement-Supplementary_Table_5.pdf]

Supplemental Table 5 - MWCNT-COOH 500 pg/mL - Differentially Expressed Proteins

| Protein ID  | Gene Symbol | Protein Name                                                                   | Fold Change<br>500pg | Multiple<br>Comparison p | ANOVA p<br>value | Q value |
|-------------|-------------|--------------------------------------------------------------------------------|----------------------|--------------------------|------------------|---------|
| IPI00784154 | HSPD1       | 60 kDa heat shock protein, mitochondrial                                       | -1.1                 | 0.02                     | 0.01             | 0.14    |
| IPI00470528 | RPL15       | 60S ribosomal protein L15                                                      | -1.9                 | 0.001                    | 0.00006          | 0.02    |
| IPI00219155 | RPL27       | 60S ribosomal protein L27                                                      | -1.2                 | 0.00005                  | 0.001            | 0.009   |
| IPI00909247 | ACTR2       | Actin-like protein 2                                                           | -1.4                 | 0.05                     | 0.01             | 0.17    |
| IPI00028091 | ACTR3       | Actin-related protein 3                                                        | -1.2                 | 0.01                     | 0.0003           | 0.10    |
| IPI00641214 | ADCY10      | Adenylate cyclase type 10, isoform 2                                           | -1.7                 | 0.02                     | 0.008            | 0.12    |
| IPI00032179 | SERPINC1    | Antithrombin-III                                                               | -1.2                 | 0.01                     | 0.004            | 0.08    |
| IPI00027178 | AP1G2       | AP-1 complex subunit gamma-like 2                                              | 1.6                  | 0.001                    | 0.001            | 0.02    |
| IPI00019918 | DDX19A      | ATP-dependent RNA helicase DDX19A                                              | -1.4                 | 0.0001                   | 0.0006           | 0.01    |
| IPI00304409 | CARHSP1     | Calcium-regulated heat stable protein 1                                        | -1.2                 | 0.05                     | 0.01             | 0.17    |
| IPI00020599 | CALR        | Calreticulin                                                                   | -1.2                 | 0.01                     | 0.009            | 0.10    |
| IPI00216088 | CRABP2      | Cellular retinoic acid-binding protein 2                                       | -1.2                 | 0.02                     | 0.005            | 0.11    |
| IPI00012011 | CFL1        | Cofilin-1                                                                      | -1.2                 | 0.04                     | 0.003            | 0.16    |
| IPI00007673 | CHCHD2      | Coiled-coil-helix-coiled-coil-helix domain-containing protein 2, mitochondrial | -1.3                 | 0.01                     | 0.006            | 0.08    |
| IPI00302944 | COL12A1     | Collagen alpha-1(XII) chain, isoform 4                                         | -1.6                 | 0.005                    | 0.005            | 0.06    |
| IPI00021828 | CSTB        | Cystatin-B                                                                     | -1.3                 | 0.002                    | 0.001            | 0.03    |
| IPI00442073 | CSRP1       | Cysteine and glycine-rich protein 1                                            | -1.4                 | 0.000005                 | 0.000009         | 0.003   |
| IPI00000155 | GLYR1       | Cytokine-like nuclear factor n-pac, isoform CRA_a                              | -1.5                 | 0.002                    | 0.0009           | 0.04    |
| IPI00921830 | DBI         | Diazepam binding inhibitor (GABA receptor modulator, acyl-CoA binding prot     | -1.3                 | 0.0008                   | 0.0001           | 0.02    |
| IPI00924974 | DPP4        | Dipeptidyl-peptidase 4                                                         | -1.4                 | 0.02                     | 0.003            | 0.10    |
| IPI00795769 | DNAJA2      | DnaJ (Hsp40) homolog, subfamily A, member 2                                    | -1.2                 | 0.0006                   | 0.005            | 0.02    |
| IPI00789999 | DCTN2       | Dynactin 2 (p50)                                                               | -1.5                 | 0.03                     | 0.01             | 0.15    |
| IPI00888430 | DNAH17      | Dynein heavy chain 17, axonemal, isoform 1                                     | -1.2                 | 0.0002                   | 0.01             | 0.01    |
| IPI00301936 | ELAVL1      | ELAV (embryonic lethal, abnormal vision, Drosophila)-like 1 (Hu antigen R)     | -1.6                 | 0.0006                   | 0.00009          | 0.02    |
| IPI00940393 | EEF1A1      | Elongation factor 1-alpha                                                      | -1.2                 | 0.02                     | 0.007            | 0.13    |
| IPI00025447 | EEF1A1      | Elongation factor 1-alpha                                                      | -1.2                 | 0.03                     | 0.009            | 0.15    |
| IPI00178440 | EEF1B2      | Elongation factor 1-beta                                                       | -1.2                 | 0.007                    | 0.006            | 0.08    |
| IPI00029631 | ERH         | Enhancer of rudimentary homolog                                                | -1.2                 | 0.01                     | 0.01             | 0.10    |
| IPI00465248 | ENO1        | Enolase, alpha                                                                 | -1.2                 | 0.003                    | 0.007            | 0.04    |
| IPI00009328 | EIF4A3      | Eukaryotic initiation factor 4A-III                                            | -1.3                 | 0.03                     | 0.006            | 0.16    |
| IPI00010290 | FABP1       | FABP1 protein (Fragment)                                                       | -1.2                 | 0.007                    | 0.002            | 0.06    |
| IPI00002922 | TBL1XR1     | F-box-like/WD repeat-containing protein TBL1XR1                                | -1.7                 | 0.001                    | 0.0002           | 0.02    |
| IPI00792375 | ALDOC       | Fructose-bisphosphate aldolase                                                 | -1.2                 | 0.002                    | 0.01             | 0.04    |
| IPI00418262 | ALDOC       | Fructose-bisphosphate aldolase                                                 | -1.2                 | 0.002                    | 0.002            | 0.04    |
| IPI00465439 | ALDOA       | Fructose-bisphosphate aldolase A                                               | -1.3                 | 0.003                    | 0.001            | 0.04    |
| IPI00023673 | LGALS3BP    | Galectin-3-binding protein                                                     | -1.3                 | 0.01                     | 0.007            | 0.08    |

|             |           |                                                                           |      |         |          |       |
|-------------|-----------|---------------------------------------------------------------------------|------|---------|----------|-------|
| IPI00383900 | RNASEH1   | Gastric cancer-related protein GCYS-20                                    | -1.7 | 0.0003  | 0.00002  | 0.01  |
| IPI00216159 | GFPT2     | Glucosamine--fructose-6-phosphate aminotransferase [isomerizing] 2        | 2.1  | 0.00003 | 0.000004 | 0.007 |
| IPI00016801 | GLUD1     | Glutamate dehydrogenase 1, mitochondrial                                  | -1.2 | 0.01    | 0.007    | 0.10  |
| IPI00909080 | GPD1      | Glycerol-3-phosphate dehydrogenase                                        | 1.6  | 0.006   | 0.001    | 0.06  |
| IPI00743931 | GORASP2   | Golgi reassembly-stacking protein 2                                       | -1.5 | 0.02    | 0.009    | 0.13  |
| IPI00218070 | GRB2      | Growth factor receptor-bound protein 2, isoform GRB3-3                    | 1.2  | 0.02    | 0.01     | 0.10  |
| IPI00007015 | GDF2      | Growth/differentiation factor 2                                           | -1.3 | 0.003   | 0.007    | 0.04  |
| IPI00924758 | GNB2      | Guanine nucleotide-binding protein G(I)/G(S)/G(T) subunit beta-2, variant | -1.1 | 0.01    | 0.002    | 0.10  |
| IPI00003348 | GNB2      | Guanine nucleotide-binding protein G(I)/G(S)/G(T) subunit beta-2, variant | -1.1 | 0.03    | 0.008    | 0.15  |
| IPI00935211 | HSPE1     | Heat shock 10kDa protein 1                                                | -1.2 | 0.03    | 0.01     | 0.15  |
| IPI00218993 | HSPH1     | Heat shock protein 105 kDa, isoform Beta                                  | -1.2 | 0.009   | 0.01     | 0.08  |
| IPI00922032 | HDGF      | Hepatoma-derived growth factor                                            | -1.4 | 0.0004  | 0.0001   | 0.01  |
| IPI00963980 | HNRNPD    | Heterogeneous nuclear ribonucleoprotein D (AU-rich element RNA binding p  | -1.2 | 0.001   | 0.002    | 0.03  |
| IPI00465225 | HNRNPL    | heterogeneous nuclear ribonucleoprotein L isoform b                       | -1.2 | 0.003   | 0.001    | 0.04  |
| IPI00027834 | HNRNPL    | Heterogeneous nuclear ribonucleoprotein L, variant                        | -1.2 | 0.0008  | 0.004    | 0.02  |
| IPI00412406 | HMGXB4    | High-mobility group protein 2-like 1                                      | -1.5 | 0.01    | 0.01     | 0.10  |
| IPI00220403 | HIST1H2BB | Histone H2B type 1-B                                                      | 1.3  | 0.008   | 0.00003  | 0.08  |
| IPI00477495 | H2BFS     | Histone H2B type F-S                                                      | 1.3  | 0.009   | 0.00004  | 0.08  |
| IPI00009286 | MLL       | Histone-lysine N-methyltransferase MLL, isoform 1                         | -1.3 | 0.0008  | 0.006    | 0.02  |
| IPI00792333 | IBTK      | Inhibitor of Bruton tyrosine kinase, isoform 1                            | 1.4  | 0.006   | 0.002    | 0.06  |
| IPI00010697 | ITGA6     | Integrin alpha-6, isoform Alpha-6X1X2B                                    | -1.3 | 0.02    | 0.009    | 0.12  |
| IPI00297632 | KRT33A    | Keratin, type I cuticular Ha3-I                                           | -1.3 | 0.003   | 0.001    | 0.04  |
| IPI00299145 | KRT6C     | Keratin, type II cytoskeletal 6C                                          | -1.3 | 0.01    | 0.002    | 0.08  |
| IPI00293276 | MIF       | Macrophage migration inhibitory factor                                    | 1.8  | 0.0005  | 0.00004  | 0.02  |
| IPI00927864 | MDH2      | Malate dehydrogenase                                                      | -1.3 | 0.0004  | 0.001    | 0.01  |
| IPI00103397 | MUC5AC    | Mucin-5AC                                                                 | -1.1 | 0.05    | 0.006    | 0.19  |
| IPI00796366 | MYL6      | Myosin, light chain 6, alkali, smooth muscle and non-muscle               | -1.1 | 0.05    | 0.01     | 0.18  |
| IPI00413922 | MYL6B     | Myosin, light chain 6B, alkali, smooth muscle and non-muscle              | -1.1 | 0.04    | 0.01     | 0.16  |
| IPI00926178 | MTPN      | Myotrophin                                                                | -1.2 | 0.03    | 0.005    | 0.15  |
| IPI00026167 | NHP2L1    | NHP2-like protein 1                                                       | -1.3 | 0.02    | 0.005    | 0.14  |
| IPI00100197 | NSFL1C    | NSFL1 cofactor p47, isoform 1                                             | -1.2 | 0.05    | 0.006    | 0.18  |
| IPI00013216 | ORC2L     | Origin recognition complex subunit 2                                      | -1.2 | 0.03    | 0.001    | 0.15  |
| IPI00024157 | FKBP3     | Peptidyl-prolyl cis-trans isomerase FKBP3                                 | -1.2 | 0.006   | 0.004    | 0.06  |
| IPI00910950 | PGD       | Phosphogluconate dehydrogenase                                            | 1.4  | 0.02    | 0.008    | 0.11  |
| IPI00169383 | PGK1      | Phosphoglycerate kinase 1                                                 | -1.2 | 0.0004  | 0.0002   | 0.01  |
| IPI00219568 | PGK2      | Phosphoglycerate kinase 2                                                 | -1.3 | 0.002   | 0.0008   | 0.04  |
| IPI00788837 | PCBP2     | Poly(rC) binding protein 2, variant                                       | -1.2 | 0.02    | 0.0009   | 0.14  |
| IPI00012066 | PCBP2     | Poly(rC)-binding protein 2, isoform b                                     | -1.1 | 0.04    | 0.0007   | 0.16  |

|             |          |                                                                            |      |         |         |       |
|-------------|----------|----------------------------------------------------------------------------|------|---------|---------|-------|
| IPI00301154 | PABPC3   | Polyadenylate-binding protein 3                                            | -1.1 | 0.04    | 0.002   | 0.16  |
| IPI00880097 | POLR2J   | Polymerase (RNA) II (DNA directed) polypeptide J, 13.3kDa                  | -1.3 | 0.02    | 0.0005  | 0.13  |
| IPI00246058 | PDCD6IP  | Programmed cell death 6-interacting protein                                | -1.2 | 0.0004  | 0.0001  | 0.01  |
| IPI00298547 | PARK7    | Protein DJ-1                                                               | -1.1 | 0.005   | 0.006   | 0.06  |
| IPI00473047 | PRKAG1   | Protein kinase, AMP-activated, gamma 1 non-catalytic subunit               | 1.1  | 0.04    | 0.01    | 0.16  |
| IPI00022078 | NDRG1    | Protein NDRG1                                                              | -1.4 | 0.003   | 0.0002  | 0.04  |
| IPI00030355 | PPP1R11  | Protein phosphatase 1 regulatory subunit 11                                | -1.3 | 0.01    | 0.003   | 0.10  |
| IPI00060283 | SLC38A10 | Putative sodium-coupled neutral amino acid transporter 10, isoform 2       | -1.4 | 0.02    | 0.006   | 0.11  |
| IPI00550069 | RNH1     | Ribonuclease inhibitor                                                     | -1.2 | 0.0002  | 0.0001  | 0.01  |
| IPI00397676 | RPL7A    | Ribosomal protein L7a                                                      | -1.2 | 0.02    | 0.009   | 0.10  |
| IPI00793137 | RPSAP58  | Ribosomal protein SA pseudogene 58                                         | -1.2 | 0.03    | 0.01    | 0.15  |
| IPI00797741 | RPLP0    | Ribosomal protein, large, P0, variant                                      | -1.3 | 0.003   | 0.0006  | 0.04  |
| IPI00215743 | RRBP1    | Ribosome-binding protein 1, isoform 3                                      | -1.2 | 0.004   | 0.0004  | 0.06  |
| IPI00556485 | RPLP0    | RPLP0 protein                                                              | -1.2 | 0.009   | 0.004   | 0.08  |
| IPI00003377 | SRSF7    | Serine/arginine-rich splicing factor 7, isoform 1                          | 1.4  | 0.04    | 0.004   | 0.17  |
| IPI00943308 | SRSF7    | Serine/arginine-rich splicing factor 7, variant                            | 1.5  | 0.003   | 0.0008  | 0.04  |
| IPI00410128 | PPP1CA   | serine/threonine-protein phosphatase PP1-alpha catalytic subunit isoform 2 | -1.2 | 0.04    | 0.007   | 0.16  |
| IPI00027423 | PPP1CA   | serine/threonine-protein phosphatase PP1-alpha catalytic subunit isoform 3 | -1.2 | 0.05    | 0.004   | 0.17  |
| IPI00032134 | SERPINB8 | Serpin B8                                                                  | -1.3 | 0.0004  | 0.0002  | 0.01  |
| IPI00925579 | SRI      | Sorcin                                                                     | -1.3 | 0.04    | 0.01    | 0.16  |
| IPI00917346 | SRSF7    | Splicing factor, arginine/serine-rich 7                                    | 1.5  | 0.006   | 0.0005  | 0.06  |
| IPI00019407 | NSDHL    | Sterol-4-alpha-carboxylate 3-dehydrogenase, decarboxylating                | 1.5  | 0.01    | 0.001   | 0.08  |
| IPI00023234 | UBA2     | SUMO-activating enzyme subunit 2                                           | -1.3 | 0.0004  | 0.001   | 0.01  |
| IPI00216298 | TXN      | Thioredoxin                                                                | -1.2 | 0.01    | 0.01    | 0.08  |
| IPI00329633 | TARS     | Threonyl-tRNA synthetase, cytoplasmic                                      | -1.3 | 0.03    | 0.01    | 0.15  |
| IPI00220827 | TMSB10   | Thymosin beta-10                                                           | -1.3 | 0.04    | 0.007   | 0.16  |
| IPI00644531 | TAGLN2   | Transgelin-2, variant or isoform                                           | -1.4 | 0.00008 | 0.00004 | 0.009 |
| IPI00550363 | TAGLN2   | Transgelin-2, variant or isoform                                           | -1.4 | 0.00008 | 0.00005 | 0.009 |
| IPI00465028 | TPI1     | Triosephosphate isomerase isoform 2                                        | -1.2 | 0.0004  | 0.00009 | 0.01  |
| IPI00550917 | TWF2     | Twinfilin-2                                                                | -1.3 | 0.001   | 0.001   | 0.03  |
| IPI00009913 | TDP2     | Tyrosyl-DNA phosphodiesterase 2, isoform 1                                 | -1.5 | 0.05    | 0.009   | 0.18  |
| IPI00021759 | USP6     | Ubiquitin carboxyl-terminal hydrolase 6, isoform 2                         | -1.3 | 0.003   | 0.007   | 0.04  |
| IPI00472498 | UBE2V1   | Ubiquitin-conjugating enzyme E2 variant 1, isoform 3                       | -1.3 | 0.01    | 0.004   | 0.08  |
| IPI00007847 | UBE2V1   | Ubiquitin-conjugating enzyme E2 variant 1, isoform 4                       | -1.3 | 0.04    | 0.006   | 0.16  |
| IPI00647442 | VDAC2    | Voltage-dependent anion channel 2                                          | -1.4 | 0.04    | 0.007   | 0.16  |
