# Supplementary material
Source: PubMed Central journal article supplement (PMC3822612)
Supplement: NIHMS516529-supplement-Supplementary_Table_7.pdf [file NIHMS516529-supplement-Supplementary_Table_7.pdf]

Supplemental Table 7. MWCNT-PVP 500 pg/mL - Differentially Expressed Proteins

| Protein ID  | Gene Name | Protein Name                                                                                  | Fold Change<br>500pg | Multiple<br>Comparison p | ANOVA p<br>value | Q value |
|-------------|-----------|-----------------------------------------------------------------------------------------------|----------------------|--------------------------|------------------|---------|
| IPI00018398 | PSMC3     | 26S protease regulatory subunit 6A                                                            | 1.1                  | 0.01                     | 0.01             | 0.03    |
| IPI00025091 | RPS11     | 40S ribosomal protein S11                                                                     | 2.0                  | 0.03                     | 0.01             | 0.03    |
| IPI00894147 | RPS18     | 40S ribosomal protein S18                                                                     | 2.9                  | 0.04                     | 0.001            | 0.03    |
| IPI00794061 | RPS20     | 40S ribosomal protein S20, variant                                                            | 1.2                  | 0.01                     | 0.001            | 0.03    |
| IPI00012493 | RPS20     | 40S ribosomal protein S20, variant                                                            | 1.2                  | 0.02                     | 0.003            | 0.03    |
| IPI00555941 | RPS5      | 40S ribosomal protein S5                                                                      | 1.3                  | 0.03                     | 0.009            | 0.03    |
| IPI00386083 | NT5C      | 5', 3'-nucleotidase, isoform 2, cytosolic                                                     | -1.4                 | 0.007                    | 0.001            | 0.02    |
| IPI00853485 | RPL10     | 60S ribosomal protein L10                                                                     | 1.5                  | 0.003                    | 0.002            | 0.02    |
| IPI00647168 | RPL11     | 60S ribosomal protein L11                                                                     | 1.5                  | 0.007                    | 0.004            | 0.03    |
| IPI00176755 | RPL23A    | 60S ribosomal protein L23a                                                                    | 1.5                  | 0.003                    | 0.005            | 0.02    |
| IPI00027270 | RPL26     | 60S ribosomal protein L26                                                                     | 1.3                  | 0.05                     | 0.001            | 0.04    |
| IPI00456758 | RPL27A    | 60S ribosomal protein L27a                                                                    | 1.5                  | 0.002                    | 0.004            | 0.02    |
| IPI00329389 | RPL6      | 60S ribosomal protein L6                                                                      | 1.9                  | 0.05                     | 0.003            | 0.04    |
| IPI00791448 | RPLP0     | 60S ribosomal protein P0                                                                      | 1.3                  | 0.05                     | 0.005            | 0.04    |
| IPI00790196 | ACAA1     | Acetyl-CoA acyltransferase 1, peroxisomal                                                     | 1.3                  | 0.007                    | 0.01             | 0.03    |
| IPI00382703 | ACP1      | Acid phosphatase 1, soluble                                                                   | 1.4                  | 0.04                     | 0.01             | 0.03    |
| IPI00008485 | ACO1      | Aconitate hydratase, cytoplasmic                                                              | 1.4                  | 0.02                     | 0.003            | 0.03    |
| IPI00013508 | ACTN1     | Actinin, alpha 1                                                                              | 1.2                  | 0.04                     | 0.01             | 0.03    |
| IPI00927573 | APEH      | Acylamino-acid-releasing enzyme, variant                                                      | 1.4                  | 0.003                    | 0.002            | 0.02    |
| IPI00337741 | APEH      | Acylamino-acid-releasing enzyme, variant                                                      | 1.4                  | 0.05                     | 0.004            | 0.04    |
| IPI00020530 | ACOT13    | Acyl-coenzyme A thioesterase 13                                                               | 1.3                  | 0.01                     | 0.01             | 0.03    |
| IPI00328257 | AP1B1     | Adaptor-related protein complex 1, beta 1 subunit, isoform A                                  | 1.2                  | 0.03                     | 0.008            | 0.03    |
| IPI00946351 | AP1B1     | Adaptor-related protein complex 1, beta 1 subunit, variant                                    | 1.2                  | 0.05                     | 0.009            | 0.05    |
| IPI00027178 | AP1G2     | Adaptor-related protein complex 1, gamma 2 subunit                                            | 2.1                  | 0.0008                   | 0.0006           | 0.02    |
| IPI00790702 | AP2B1     | Adaptor-related protein complex 2, beta 1 subunit                                             | 1.3                  | 0.04                     | 0.005            | 0.04    |
| IPI00218693 | APRT      | Adenine phosphoribosyltransferase, variant                                                    | 1.2                  | 0.03                     | 0.008            | 0.03    |
| IPI00215901 | AK2       | Adenylate kinase 2, mitochondrial, isoform 1                                                  | 1.2                  | 0.01                     | 0.00007          | 0.03    |
| IPI00922165 | AK2       | Adenylate kinase 2, mitochondrial, isoform 5                                                  | 1.2                  | 0.01                     | 0.0006           | 0.03    |
| IPI00641064 | NUDT5     | ADP-sugar pyrophosphatase                                                                     | 1.6                  | 0.05                     | 0.009            | 0.04    |
| IPI00910701 | AARS      | Alanyl-tRNA synthetase                                                                        | 1.2                  | 0.05                     | 0.008            | 0.04    |
| IPI00218918 | ANXA1     | Annexin A1, variant                                                                           | 1.2                  | 0.04                     | 0.01             | 0.04    |
| IPI00964340 | ANXA3     | Annexin A3                                                                                    | 1.1                  | 0.002                    | 0.006            | 0.02    |
| IPI00908963 | ATP5A1    | ATP synthase, H <sup>+</sup> transporting, mitochondrial F1 complex, alpha subunit 1, variant | 1.2                  | 0.03                     | 0.006            | 0.03    |
| IPI00440493 | ATP5A1    | ATP synthase, H <sup>+</sup> transporting, mitochondrial F1 complex, alpha subunit 1, variant | 1.2                  | 0.01                     | 0.003            | 0.03    |
| IPI00852619 | ATP10B    | ATPase, class V, type 10B                                                                     | -2.4                 | 0.04                     | 0.002            | 0.03    |

|             |         |                                                                                |      |       |          |      |
|-------------|---------|--------------------------------------------------------------------------------|------|-------|----------|------|
| IPI00885178 | BAX     | BCL2-associated X protein, isoform Zeta                                        | 2.2  | 0.02  | 0.006    | 0.03 |
| IPI00929107 | BSC12   | Berardinelli-Seip congenital lipodystrophy 2 (seipin)                          | 1.3  | 0.02  | 0.003    | 0.03 |
| IPI00219910 | BLVRB   | Biliverdin reductase B (flavin reductase (NADPH))                              | 1.2  | 0.05  | 0.01     | 0.04 |
| IPI00478437 | CALML4  | Calmodulin-like protein 4, isoform 1                                           | 1.5  | 0.002 | 0.004    | 0.02 |
| IPI00289758 | CAPN2   | Calpain 2, catalytic subunit                                                   | 1.4  | 0.02  | 0.007    | 0.03 |
| IPI00910745 | CAPN2   | Calpain 2, catalytic subunit, variant                                          | 1.3  | 0.03  | 0.01     | 0.03 |
| IPI00639931 | CAP1    | CAP, adenylate cyclase-associated protein 1, isoform 2                         | 1.3  | 0.05  | 0.01     | 0.04 |
| IPI00965804 | CAP1    | CAP, adenylate cyclase-associated protein 1, variant                           | 1.4  | 0.04  | 0.006    | 0.03 |
| IPI00295386 | CBR1    | Carbonyl reductase 1                                                           | 1.2  | 0.01  | 0.007    | 0.03 |
| IPI00099670 | CEL     | Carboxyl ester lipase precursor                                                | -1.3 | 0.01  | 0.00009  | 0.03 |
| IPI00010180 | CES1    | Carboxylesterase 1                                                             | 1.2  | 0.03  | 0.007    | 0.03 |
| IPI00297779 | CCT2    | Chaperonin containing TCP1, subunit 2 (beta)                                   | 1.3  | 0.01  | 0.009    | 0.03 |
| IPI00797206 | CCT8    | Chaperonin containing TCP1, subunit 8 (theta)                                  | 1.3  | 0.01  | 0.007    | 0.03 |
| IPI00024067 | CLTC    | Clathrin heavy chain 1, isoform 1                                              | 1.2  | 0.01  | 0.009    | 0.03 |
| IPI00291930 | CLINT1  | Clathrin interactor 1                                                          | 1.4  | 0.04  | 0.003    | 0.03 |
| IPI00012011 | CFL1    | Cofilin 1                                                                      | 1.3  | 0.05  | 0.002    | 0.04 |
| IPI00007673 | CHCHD2  | Coiled-coil-helix-coiled-coil-helix domain-containing protein 2, mitochondrial | 1.3  | 0.05  | 0.005    | 0.04 |
| IPI00640313 | CPNE1   | Copine 1                                                                       | 1.3  | 0.02  | 0.008    | 0.03 |
| IPI00022977 | CKB     | Creatine kinase B-type                                                         | 1.4  | 0.02  | 0.007    | 0.03 |
| IPI00021828 | CSTB    | Cystatin-B                                                                     | 1.4  | 0.007 | 0.001    | 0.02 |
| IPI00909853 | DDTL    | D-dopachrome tautomerase-like                                                  | 1.5  | 0.003 | 0.01     | 0.02 |
| IPI00168885 | DHX57   | DEAH (Asp-Glu-Ala-Asp/His) box polypeptide 57, isoform 1                       | 1.4  | 0.02  | 0.007    | 0.03 |
| IPI00749029 | DHX57   | DEAH (Asp-Glu-Ala-Asp/His) box polypeptide 57, isoform 2                       | 1.4  | 0.03  | 0.01     | 0.03 |
| IPI00645171 | DPP3    | Dipeptidyl peptidase 3, isoform 2                                              | 1.2  | 0.04  | 0.003    | 0.04 |
| IPI00018953 | DPP4    | Dipeptidyl peptidase 4                                                         | 1.2  | 0.05  | 0.006    | 0.04 |
| IPI00412497 | DYNLRB1 | Dynein, light chain, roadblock-type 1                                          | 1.2  | 0.03  | 0.003    | 0.03 |
| IPI00186290 | EEF2    | Elongation factor 2                                                            | 1.3  | 0.02  | 0.002    | 0.03 |
| IPI00873286 | EIF3C   | Eukaryotic translation initiation factor 3, subunit 8                          | 1.5  | 0.05  | 0.002    | 0.04 |
| IPI00654777 | EIF3F   | Eukaryotic translation initiation factor 3, subunit F                          | -1.1 | 0.01  | 0.000003 | 0.03 |
| IPI00924536 | EIF4A2  | Eukaryotic translation initiation factor 4A2                                   | 1.3  | 0.03  | 0.004    | 0.03 |
| IPI00328328 | EIF4A2  | Eukaryotic translation initiation factor 4A2, isoform 1                        | 1.2  | 0.001 | 0.008    | 0.02 |
| IPI00910936 | EIF5    | Eukaryotic translation initiation factor 5                                     | 1.6  | 0.02  | 0.005    | 0.03 |
| IPI00302458 | XPO7    | Exportin 7                                                                     | 1.4  | 0.01  | 0.0005   | 0.03 |
| IPI00843975 | EZR     | Ezrin (Cytovillin 2), variant                                                  | 1.3  | 0.05  | 0.01     | 0.04 |
| IPI00384282 | EZR     | Ezrin (Cytovillin 2), variant                                                  | 1.6  | 0.02  | 0.004    | 0.03 |
| IPI00642845 | FAM38B  | Family with sequence similarity 38, member B                                   | 1.2  | 0.007 | 0.0002   | 0.02 |
| IPI00941166 | FCGBP   | Fc fragment of IgG binding protein, variant                                    | 1.4  | 0.03  | 0.007    | 0.03 |
| IPI00647507 | FKBP1A  | FK506 binding protein 1A, 12kDa                                                | 1.3  | 0.002 | 0.01     | 0.02 |

|             |            |                                                                                 |      |         |        |       |
|-------------|------------|---------------------------------------------------------------------------------|------|---------|--------|-------|
| IPI00031564 | GGCT       | Gamma-glutamylcyclotransferase, isoform 1                                       | 1.4  | 0.005   | 0.0006 | 0.02  |
| IPI00383900 | RNASEH1    | Gastric cancer-related protein GCYS-20 (RNaseH-like)                            | -1.7 | 0.0002  | 0.0002 | 0.007 |
| IPI00009305 | GNPDA1     | Glucosamine-6-phosphate deaminase 1                                             | 1.4  | 0.03    | 0.002  | 0.03  |
| IPI00216159 | GFPT2      | Glutamine-fructose-6-phosphate transaminase 2                                   | 1.6  | 0.02    | 0.008  | 0.03  |
| IPI00953236 | GSR        | Glutathione reductase, delta 8, alternative splice variant                      | 1.3  | 0.04    | 0.003  | 0.04  |
| IPI00909080 | GPD1       | Glycerol-3-phosphate dehydrogenase                                              | 1.8  | 0.00007 | 0.0006 | 0.007 |
| IPI00783097 | GARS       | Glycyl-tRNA synthetase                                                          | 1.8  | 0.05    | 0.005  | 0.04  |
| IPI00220766 | GLO1       | Glyoxalase I                                                                    | 1.2  | 0.04    | 0.004  | 0.03  |
| IPI00021327 | GRB2       | Growth factor receptor-bound protein 2, isoform 1                               | 1.3  | 0.04    | 0.004  | 0.04  |
| IPI00218070 | GRB2       | Growth factor receptor-bound protein 2, isoform GRB3-3                          | 1.4  | 0.03    | 0.005  | 0.03  |
| IPI00000006 | HRAS       | GTPase (v-Ha-ras Harvey rat sarcoma viral oncogene homolog )                    | 1.8  | 0.04    | 0.0007 | 0.04  |
| IPI00910755 | HSPH1      | Heat shock 105kDa/110kDa protein 1                                              | 1.2  | 0.05    | 0.003  | 0.04  |
| IPI00911039 | HSPA1B     | Heat shock 70 kDa protein 1                                                     | 1.3  | 0.03    | 0.006  | 0.03  |
| IPI00304925 | HSPA1A     | Heat shock 70 kDa protein 1A                                                    | 1.2  | 0.04    | 0.007  | 0.03  |
| IPI00003865 | HSPA8      | Heat shock 70kDa protein 8, isoform 1                                           | 1.2  | 0.05    | 0.007  | 0.04  |
| IPI00037070 | HSPA8      | Heat shock 70kDa protein 8, isoform 2                                           | 1.2  | 0.03    | 0.006  | 0.03  |
| IPI00966238 | HSPA9      | Heat shock 70kDa protein 9 (mortalin)                                           | 1.4  | 0.05    | 0.005  | 0.04  |
| IPI00382470 | HSP90AA1   | Heat shock protein 90kDa alpha (cytosolic), class A member 1                    | 1.2  | 0.05    | 0.009  | 0.04  |
| IPI00414676 | HSP90AB1   | Heat shock protein 90kDa alpha (cytosolic), class B member 1                    | 1.1  | 0.05    | 0.01   | 0.04  |
| IPI00967562 | HNRNPD     | Heterogeneous nuclear ribonucleoprotein D (AU-rich element RNA binding protein) | 1.2  | 0.04    | 0.01   | 0.04  |
| IPI00028888 | HNRNPD     | Heterogeneous nuclear ribonucleoprotein D0, isoform 1                           | 1.2  | 0.04    | 0.01   | 0.04  |
| IPI00013881 | HNRNPH1    | Heterogeneous nuclear ribonucleoprotein H, variant                              | 1.2  | 0.03    | 0.001  | 0.03  |
| IPI00964535 | HNRNPH1    | Heterogeneous nuclear ribonucleoprotein H, variant                              | 1.3  | 0.02    | 0.004  | 0.03  |
| IPI00963924 | HNRNPH1    | Heterogeneous nuclear ribonucleoprotein H, variant                              | 1.5  | 0.02    | 0.003  | 0.03  |
| IPI00013877 | HNRNPH3    | Heterogeneous nuclear ribonucleoprotein H3, isoform 1                           | 1.5  | 0.009   | 0.0006 | 0.03  |
| IPI00644079 | HNRNPU     | Heterogeneous nuclear ribonucleoprotein U (scaffold attachment factor A)        | 1.4  | 0.02    | 0.005  | 0.03  |
| IPI00456887 | HNRNPU2    | Heterogeneous nuclear ribonucleoprotein U-like protein 2                        | 1.3  | 0.02    | 0.003  | 0.03  |
| IPI00788220 | HMGB1      | High mobility group protein B1                                                  | 1.4  | 0.006   | 0.002  | 0.02  |
| IPI00419258 | HMGB1      | High mobility group protein B1, variant                                         | 1.5  | 0.04    | 0.004  | 0.03  |
| IPI00644653 | HMGB1      | High mobility group protein B1, variant                                         | 1.6  | 0.04    | 0.003  | 0.04  |
| IPI00021808 | HARS       | Histidyl-tRNA synthetase, cytoplasmic                                           | 1.3  | 0.007   | 0.003  | 0.03  |
| IPI00217465 | HIST1H1C   | Histone H1.2                                                                    | 1.6  | 0.005   | 0.008  | 0.02  |
| IPI00216456 | HIST1H2AC  | Histone H2A type 1-C                                                            | 1.4  | 0.01    | 0.01   | 0.03  |
| IPI00216457 | HIST2H2AA4 | Histone H2A type 2-A                                                            | 1.6  | 0.04    | 0.009  | 0.04  |
| IPI00216730 | HIST2H2AB  | Histone H2A type 2-B                                                            | 1.4  | 0.01    | 0.01   | 0.03  |
| IPI00220855 | H2AFJ      | Histone H2A.J, isoform 1                                                        | 1.7  | 0.02    | 0.002  | 0.03  |
| IPI00018278 | H2AFV      | Histone H2A.V                                                                   | 1.6  | 0.03    | 0.004  | 0.03  |
| IPI00219037 | H2AFX      | Histone H2A.x                                                                   | 1.5  | 0.04    | 0.01   | 0.04  |

|             |           |                                                          |     |        |          |       |
|-------------|-----------|----------------------------------------------------------|-----|--------|----------|-------|
| IPI00220403 | HIST1H2BB | Histone H2B type 1-B                                     | 1.7 | 0.006  | 0.005    | 0.02  |
| IPI00477495 | H2BFS     | Histone H2B type F-S                                     | 1.8 | 0.02   | 0.001    | 0.03  |
| IPI00643815 | BAT1      | HLA-B associated transcript 1, variant                   | 1.3 | 0.01   | 0.01     | 0.03  |
| IPI00893920 | BAT1      | HLA-B associated transcript 1, variant                   | 1.4 | 0.02   | 0.004    | 0.03  |
| IPI00922127 | HYOU1     | Hypoxia up-regulated 1                                   | 1.3 | 0.03   | 0.003    | 0.03  |
| IPI00922838 | HYOU1     | Hypoxia up-regulated protein 1                           | 1.2 | 0.04   | 0.008    | 0.03  |
| IPI00795859 | IMPDH2    | IMP (inosine 5'-monophosphate) dehydrogenase 2, variant  | 1.1 | 0.03   | 0.000003 | 0.03  |
| IPI00792333 | IBTK      | Inhibitor of Bruton tyrosine kinase, isoform 1           | 1.7 | 0.0002 | 0.00001  | 0.007 |
| IPI00027223 | IDH1      | Isocitrate dehydrogenase [NADP], cytoplasmic             | 1.3 | 0.05   | 0.01     | 0.04  |
| IPI00554788 | KRT18     | Keratin 18                                               | 1.1 | 0.04   | 0.002    | 0.04  |
| IPI00032513 | KRT31     | Keratin 31                                               | 1.3 | 0.01   | 0.01     | 0.03  |
| IPI00009867 | KRT5      | Keratin 5                                                | 1.2 | 0.008  | 0.01     | 0.03  |
| IPI00300725 | KRT6A     | Keratin 6A                                               | 1.4 | 0.03   | 0.004    | 0.03  |
| IPI00009750 | LGALS4    | Lectin, galactoside-binding, soluble, 4                  | 1.2 | 0.01   | 0.008    | 0.03  |
| IPI00220466 | LIMA1     | LIM domain and actin-binding protein 1, isoform 3        | 1.5 | 0.04   | 0.004    | 0.03  |
| IPI00008918 | LIMA1     | LIM domain and actin-binding protein 1, isoform beta     | 1.4 | 0.04   | 0.004    | 0.04  |
| IPI00796222 | LIMA1     | LIM domain and actin-binding protein 1, isoform c        | 1.4 | 0.05   | 0.005    | 0.04  |
| IPI00010471 | LCP1      | Lymphocyte cytosolic protein 1 (L-plastin)               | 1.5 | 0.05   | 0.01     | 0.05  |
| IPI00941920 | LTA       | Lymphotoxin alpha (TNF superfamily, member 1)            | 1.7 | 0.003  | 0.0004   | 0.02  |
| IPI00293276 | MIF       | Macrophage migration inhibitory factor                   | 2.1 | 0.0004 | 0.0005   | 0.01  |
| IPI00952583 | MDH1      | Malate dehydrogenase 1, NAD (soluble)                    | 1.2 | 0.04   | 0.004    | 0.03  |
| IPI00291006 | MDH2      | Malate dehydrogenase, mitochondrial, variant             | 1.2 | 0.05   | 0.0006   | 0.05  |
| IPI00748640 | MPI       | Mannose-6-phosphate isomerase                            | 1.5 | 0.005  | 0.004    | 0.02  |
| IPI00966657 | MATR3     | Matrin 3, variant                                        | 1.3 | 0.03   | 0.002    | 0.03  |
| IPI00165360 | MPST      | Mercaptopyruvate sulfurtransferase, variant              | 1.3 | 0.002  | 0.008    | 0.02  |
| IPI00746782 | MPST      | Mercaptopyruvate sulfurtransferase, variant              | 1.4 | 0.001  | 0.005    | 0.02  |
| IPI00011876 | MTAP      | Methylthioadenosine phosphorylase                        | 1.3 | 0.003  | 0.002    | 0.02  |
| IPI00219365 | MSN       | Moesin                                                   | 1.4 | 0.04   | 0.006    | 0.03  |
| IPI00397526 | MYH10     | Myosin-10, isoform 1                                     | 1.4 | 0.05   | 0.006    | 0.04  |
| IPI00902652 | SLC9A3R1  | Na(+)/H(+) exchange regulatory cofactor NHE-RF1, variant | 1.3 | 0.005  | 0.006    | 0.02  |
| IPI00019407 | NSDHL     | NAD(P) dependent steroid dehydrogenase-like              | 1.7 | 0.001  | 0.000008 | 0.02  |
| IPI00026466 | NIPBL     | Nipped-B homolog, isoform 2                              | 1.6 | 0.03   | 0.006    | 0.03  |
| IPI00022078 | NDRG1     | N-myc downstream regulated 1                             | 1.2 | 0.03   | 0.006    | 0.03  |
| IPI00012450 | NMI       | N-myc-interactor                                         | 1.6 | 0.05   | 0.01     | 0.04  |
| IPI00304596 | NONO      | Non-POU domain-containing octamer-binding protein        | 1.2 | 0.03   | 0.0003   | 0.03  |
| IPI00152688 | NSUN6     | NOP2/Sun domain family, member 6 (methyltransferase)     | 1.6 | 0.02   | 0.01     | 0.03  |
| IPI00100197 | NSFL1C    | NSFL1 (p97) cofactor (p47), isoform 1                    | 1.2 | 0.03   | 0.008    | 0.03  |
| IPI00376904 | NSFL1C    | NSFL1 (p97) cofactor (p47), variant                      | 1.2 | 0.01   | 0.002    | 0.03  |

|             |          |                                                                                                  |     |       |        |      |
|-------------|----------|--------------------------------------------------------------------------------------------------|-----|-------|--------|------|
| IPI00646767 | NUDC     | Nuclear distribution gene C homolog                                                              | 1.3 | 0.03  | 0.01   | 0.03 |
| IPI00028005 | NUP107   | Nuclear pore complex protein Nup107                                                              | 1.4 | 0.03  | 0.0007 | 0.03 |
| IPI00183526 | NCL      | Nucleolin                                                                                        | 1.3 | 0.02  | 0.003  | 0.03 |
| IPI00017763 | NAP1L4   | Nucleosome assembly protein 1-like 4                                                             | 1.3 | 0.05  | 0.005  | 0.04 |
| IPI00018946 | PANK4    | Pantothenate kinase 4                                                                            | 1.3 | 0.03  | 0.01   | 0.03 |
| IPI00916921 | PDLIM2   | PDZ and LIM domain 2 (mystique)                                                                  | 1.5 | 0.02  | 0.002  | 0.03 |
| IPI00376170 | PPIA     | Peptidyl-prolyl cis-trans isomerase (cyclophilin A), variant                                     | 1.4 | 0.01  | 0.01   | 0.03 |
| IPI00024919 | PRDX3    | Peroxiredoxin 3, mitochondrial                                                                   | 1.2 | 0.04  | 0.008  | 0.04 |
| IPI00219446 | PEBP1    | Phosphatidylethanolamine-binding protein 1                                                       | 1.2 | 0.05  | 0.007  | 0.04 |
| IPI00030116 | PGM3     | Phosphoglucomutase 3                                                                             | 1.8 | 0.04  | 0.0005 | 0.03 |
| IPI00025273 | GART     | Phosphoribosylglycinamide formyltransferase, phosphoribosylglycinamide synthetase                | 1.3 | 0.05  | 0.008  | 0.04 |
| IPI00014808 | PAFAH1B3 | Platelet-activating factor acetylhydrolase IB, subunit gamma                                     | 1.3 | 0.03  | 0.003  | 0.03 |
| IPI00014898 | PLEC     | Plectin, isoform 1                                                                               | 1.2 | 0.05  | 0.01   | 0.04 |
| IPI00398002 | PLEC     | Plectin, isoform 3                                                                               | 1.2 | 0.05  | 0.01   | 0.04 |
| IPI00012726 | PABPC4   | Poly(A) binding protein, cytoplasmic 4 (inducible form)                                          | 1.2 | 0.04  | 0.007  | 0.04 |
| IPI00939578 | PLOD2    | Procollagen-lysine, 2-oxoglutarate 5-dioxygenase 2                                               | 1.8 | 0.01  | 0.002  | 0.03 |
| IPI00299000 | PA2G4    | Proliferation-associated protein 2G4                                                             | 1.1 | 0.02  | 0.002  | 0.03 |
| IPI00217053 | PRRC1    | Proline-rich coiled-coil 1, isoform 3                                                            | 1.2 | 0.006 | 0.01   | 0.02 |
| IPI00868717 | PRRC1    | Proline-rich coiled-coil 1, isoform 4                                                            | 1.3 | 0.01  | 0.002  | 0.03 |
| IPI00012503 | PSAP     | Prosaposin, Isoform Sap-mu-0                                                                     | 1.2 | 0.02  | 0.009  | 0.03 |
| IPI00024821 | PSMD14   | Proteasome (prosome, macropain) 26S subunit, non-ATPase, 14                                      | 1.4 | 0.03  | 0.0004 | 0.03 |
| IPI00002134 | PSMD5    | Proteasome (prosome, macropain) 26S subunit, non-ATPase, 5                                       | 1.4 | 0.02  | 0.004  | 0.03 |
| IPI00479306 | PSMB5    | Proteasome subunit beta type-5                                                                   | 1.4 | 0.003 | 0.0002 | 0.02 |
| IPI00479306 | PSMB5    | Proteasome subunit beta type-5                                                                   | 1.6 | 0.006 | 0.0004 | 0.02 |
| IPI00003217 | PSMB7    | Proteasome subunit beta type-7                                                                   | 1.5 | 0.04  | 0.01   | 0.03 |
| IPI00009904 | PDIA4    | Protein disulfide-isomerase A4                                                                   | 1.2 | 0.04  | 0.008  | 0.04 |
| IPI00299571 | PDIA6    | Protein disulfide-isomerase A6, isoform 2                                                        | 1.5 | 0.03  | 0.006  | 0.03 |
| IPI00026154 | PRKCSH   | Protein kinase C substrate 80K-H, variant                                                        | 1.5 | 0.05  | 0.004  | 0.04 |
| IPI00829824 | PRKCSH   | Protein kinase C substrate 80K-H, variant                                                        | 1.9 | 0.05  | 0.001  | 0.04 |
| IPI00218236 | PPP1CB   | Protein phosphatase 1, catalytic subunit beta                                                    | 2.3 | 0.04  | 0.0009 | 0.04 |
| IPI00554737 | PPP2R1A  | Protein phosphatase 2, regulatory subunit A, alpha                                               | 1.3 | 0.003 | 0.01   | 0.02 |
| IPI00217296 | PPP2R4   | Protein phosphatase 2A activator, regulatory subunit 4, isoform 3                                | 1.4 | 0.05  | 0.01   | 0.04 |
| IPI00171057 | SSH3     | Protein phosphatase Slingshot homolog 3, isoform 2                                               | 1.4 | 0.03  | 0.005  | 0.03 |
| IPI00218568 | PCBD1    | Pterin-4 alpha-carbinolamine dehydratase/dimerization cofactor of hepatocyte nuclear phosphatase | 1.5 | 0.01  | 0.006  | 0.03 |
| IPI00017672 | PNP      | Purine nucleoside phosphorylase                                                                  | 1.2 | 0.02  | 0.004  | 0.03 |
| IPI00013004 | PDXK     | Pyridoxal kinase, isoform 1                                                                      | 1.3 | 0.03  | 0.0004 | 0.03 |
| IPI00216320 | PDXK     | Pyridoxal kinase, isoform 2                                                                      | 1.3 | 0.03  | 0.0005 | 0.03 |
| IPI00791490 | PDXK     | Pyridoxal kinase, variant                                                                        | 1.4 | 0.03  | 0.0005 | 0.03 |

|             |          |                                                                   |      |        |          |       |
|-------------|----------|-------------------------------------------------------------------|------|--------|----------|-------|
| IPI00376503 | PYCR1    | Pyrroline-5-carboxylate reductase 1, mitochondrial isoform 2      | 1.3  | 0.005  | 0.001    | 0.02  |
| IPI00260769 | PYCR1    | Pyrroline-5-carboxylate reductase 1, variant                      | 1.2  | 0.003  | 0.01     | 0.02  |
| IPI00470610 | PYCR2    | Pyrroline-5-carboxylate reductase 2, variant                      | 1.3  | 0.009  | 0.007    | 0.03  |
| IPI00335061 | PYCR2    | Pyrroline-5-carboxylate reductase 2, variant                      | 2.0  | 0.02   | 0.0004   | 0.03  |
| IPI00550882 | PYCR1    | Pyrroline-5-carboxylate reductase, variant                        | 1.5  | 0.03   | 0.01     | 0.03  |
| IPI00399212 | RANBP1   | RAN binding protein 1, variant                                    | 1.1  | 0.05   | 0.01     | 0.04  |
| IPI00878950 | RANBP1   | RAN binding protein 1, variant                                    | 1.3  | 0.009  | 0.01     | 0.03  |
| IPI00922662 | RAB1A    | Ras-related protein Rab-1A, isoform 2                             | 1.3  | 0.006  | 0.0007   | 0.02  |
| IPI00185217 | RAB1A    | Ras-related protein Rab-1A, isoform 3                             | 1.4  | 0.01   | 0.0008   | 0.03  |
| IPI00008964 | RAB1B    | Ras-related protein Rab-1B                                        | 1.5  | 0.03   | 0.0004   | 0.03  |
| IPI00413108 | RPSAP15  | Ribosomal protein SA pseudogene 15 (laminin receptor 1)           | 1.1  | 0.05   | 0.005    | 0.04  |
| IPI00335280 | RPE      | Ribulose-phosphate 3-epimerase, isoform 1                         | 1.4  | 0.04   | 0.006    | 0.03  |
| IPI00915253 | RBM10    | RNA binding motif protein 10                                      | -2.2 | 0.007  | 0.001    | 0.03  |
| IPI00788942 | RUVBL1   | RuvB-like 1, isoform 2                                            | 1.4  | 0.04   | 0.004    | 0.04  |
| IPI00796459 | RUVBL1   | RuvB-like 1, variant                                              | 1.4  | 0.02   | 0.003    | 0.03  |
| IPI00016179 | S100A13  | S100 calcium binding protein A13                                  | 1.8  | 0.0008 | 0.0003   | 0.02  |
| IPI00844412 | SARNP    | SAP domain containing ribonucleoprotein                           | 1.3  | 0.02   | 0.005    | 0.03  |
| IPI00942368 | SELENBP1 | Selenium binding protein 1, variant                               | 1.2  | 0.02   | 0.009    | 0.03  |
| IPI00852768 | SELENBP1 | Selenium binding protein 1, variant                               | 1.2  | 0.02   | 0.01     | 0.03  |
| IPI00030385 | SELENBP1 | Selenium binding protein 1, variant                               | 1.2  | 0.009  | 0.006    | 0.03  |
| IPI00852838 | SELENBP1 | Selenium binding protein 1, variant                               | 1.3  | 0.006  | 0.006    | 0.02  |
| IPI00852953 | SELENBP1 | Selenium binding protein 1, variant                               | 1.6  | 0.009  | 0.003    | 0.03  |
| IPI00954180 | SELENBP1 | Selenium-binding protein 1, isoform 2                             | 1.2  | 0.02   | 0.009    | 0.03  |
| IPI00073763 | SEMA4C   | Semaphorin-4C                                                     | 1.4  | 0.002  | 0.003    | 0.02  |
| IPI00017469 | SPR      | Sepiapterin reductase                                             | 1.3  | 0.05   | 0.003    | 0.04  |
| IPI00784835 | SEPT9    | Septin 9, isoform f                                               | 1.6  | 0.05   | 0.002    | 0.04  |
| IPI00012340 | SRSF9    | Serine/arginine-rich splicing factor 9, variant                   | 1.3  | 0.01   | 0.005    | 0.03  |
| IPI00793205 | SRSF9    | Serine/arginine-rich splicing factor 9, variant                   | 1.4  | 0.02   | 0.006    | 0.03  |
| IPI00917641 | SMAP     | Small acidic protein isoform b                                    | 1.4  | 0.004  | 0.0008   | 0.02  |
| IPI00740142 | SNRNP200 | Small nuclear ribonucleoprotein 200kDa (U5)                       | 1.5  | 0.05   | 0.009    | 0.04  |
| IPI00029266 | SNRPE    | Small nuclear ribonucleoprotein E                                 | 1.4  | 0.01   | 0.003    | 0.03  |
| IPI00301364 | SKP1     | S-phase kinase-associated protein 1, isoform 1                    | 1.3  | 0.003  | 0.005    | 0.02  |
| IPI00300371 | SF3B3    | Splicing factor 3B subunit 3, isoform 1                           | 1.3  | 0.02   | 0.003    | 0.03  |
| IPI00032827 | SF3B14   | Splicing factor 3B, 14 kDa subunit                                | 1.4  | 0.02   | 0.0008   | 0.03  |
| IPI00917346 | SRSF7    | Splicing factor, arginine/serine-rich 7, variant                  | 1.7  | 0.002  | 0.00001  | 0.02  |
| IPI00943308 | SRSF7    | Splicing factor, arginine/serine-rich 7, variant                  | 1.8  | 0.0002 | 0.000007 | 0.007 |
| IPI00003377 | SRSF7    | Splicing factor, arginine/serine-rich 7, variant                  | 1.9  | 0.01   | 0.0001   | 0.03  |
| IPI00106642 | SDF2L1   | Stromal cell-derived factor 2-like 1 (Dihydropyrimidinase-like 2) | 1.3  | 0.04   | 0.008    | 0.04  |

|             |           |                                                                                   |      |       |          |      |
|-------------|-----------|-----------------------------------------------------------------------------------|------|-------|----------|------|
| IPI00164300 | SUCLG2    | Succinyl-CoA ligase (GDP-forming) subunit beta, mitochondrial pseudogene          | -1.2 | 0.01  | 0.000005 | 0.03 |
| IPI00218733 | SOD1      | Superoxide dismutase [Cu-Zn]                                                      | 1.2  | 0.05  | 0.01     | 0.04 |
| IPI00784161 | SUPT6H    | Suppressor of Ty 6 homolog                                                        | 2.8  | 0.03  | 0.0005   | 0.03 |
| IPI00470387 | SMARCC2   | SWI/SNF related, matrix associated, actin dependent regulator of chromatin, sub   | 1.6  | 0.01  | 0.0003   | 0.03 |
| IPI00847646 | TNKS1BP1  | Tankyrase 1 binding protein 1, 182kDa, isoform 2                                  | 1.4  | 0.03  | 0.004    | 0.03 |
| IPI00910355 | TARDBP    | TAR DNA-binding protein 43                                                        | 1.2  | 0.02  | 0.004    | 0.03 |
| IPI00658152 | TNS3      | Tensin 3, isoform 1                                                               | 1.3  | 0.05  | 0.01     | 0.04 |
| IPI00744692 | TALDO1    | Transaldolase 1                                                                   | 1.2  | 0.01  | 0.005    | 0.03 |
| IPI00789389 | TRA2B     | Transformer 2 beta homolog                                                        | 1.4  | 0.03  | 0.007    | 0.03 |
| IPI00218251 | TGM2      | Transglutaminase 2                                                                | 1.4  | 0.02  | 0.005    | 0.03 |
| IPI00946864 | TKT       | Transketolase, variant                                                            | 1.3  | 0.004 | 0.003    | 0.02 |
| IPI00554538 | TPP1      | Tripeptidyl-peptidase 1, variant                                                  | 1.4  | 0.02  | 0.001    | 0.03 |
| IPI00298237 | TPP1      | Tripeptidyl-peptidase 1, variant                                                  | 1.7  | 0.02  | 0.002    | 0.03 |
| IPI00966664 | TPM3      | Tropomyosin 3, variant                                                            | 1.1  | 0.02  | 0.008    | 0.03 |
| IPI00966664 | TPM3      | Tropomyosin 3, variant                                                            | 1.4  | 0.008 | 0.0002   | 0.03 |
| IPI00218320 | TPM3      | Tropomyosin alpha-3 chain, isoform 3                                              | 1.2  | 0.02  | 0.003    | 0.03 |
| IPI00018511 | TUBB4Q    | Tubulin beta-4q chain                                                             | -1.2 | 0.05  | 0.0002   | 0.04 |
| IPI00645452 | TUBB      | Tubulin, beta                                                                     | 1.2  | 0.04  | 0.005    | 0.04 |
| IPI00007752 | TUBB2C    | Tubulin, beta-2C                                                                  | 1.2  | 0.04  | 0.01     | 0.03 |
| IPI00216318 | YWHAB     | Tyrosine 3-monooxygenase/tryptophan 5-monooxygenase activation protein, bet       | 1.2  | 0.04  | 0.01     | 0.03 |
| IPI00000816 | YWHAE     | Tyrosine 3-monooxygenase/tryptophan 5-monooxygenase activation protein, eps       | 1.2  | 0.03  | 0.007    | 0.03 |
| IPI00794254 | YWHAH     | Tyrosine 3-monooxygenase/tryptophan 5-monooxygenase activation protein, eta       | 1.1  | 0.03  | 0.006    | 0.03 |
| IPI00150269 | PRPF4     | U4/U6 small nuclear ribonucleoprotein Prp4, isoform 1                             | 1.6  | 0.02  | 0.005    | 0.03 |
| IPI00071180 | UBQLN1    | Ubiquilin 1, isoform 2                                                            | 1.2  | 0.04  | 0.009    | 0.03 |
| IPI00872664 | USP14     | Ubiquitin carboxyl-terminal hydrolase 14, variant                                 | 1.2  | 0.04  | 0.007    | 0.04 |
| IPI00219913 | USP14     | Ubiquitin carboxyl-terminal hydrolase 14, variant                                 | 1.3  | 0.02  | 0.003    | 0.03 |
| IPI00003949 | UBE2N     | Ubiquitin-conjugating enzyme E2 N                                                 | 1.2  | 0.04  | 0.004    | 0.04 |
| IPI00006980 | C14orf166 | UPF0568 protein (CLE7)                                                            | 1.3  | 0.02  | 0.007    | 0.03 |
| IPI00514564 | XPNPEP1   | Xaa-Pro aminopeptidase 1, variant                                                 | 1.3  | 0.02  | 0.003    | 0.03 |
| IPI00550232 | XIRP2     | Xin actin-binding repeat containing 2, isoform 1                                  | 1.5  | 0.02  | 0.003    | 0.03 |
| IPI00220834 | XRCC5     | X-ray repair complementing defective repair in Chinese hamster cells 5 (double-st | 1.2  | 0.04  | 0.007    | 0.03 |
