# Supplementary material
Source: PubMed Central journal article supplement (PMC3822612)
Supplement: NIHMS516529-supplement-Supplementary_Table_8.pdf [file NIHMS516529-supplement-Supplementary_Table_8.pdf]

Supplemental Table 8. MWCNT-PVP 10 ug/mL - Differentially Expressed Proteins

| Protein ID  | Gene Name  | Protein Name                                                                                          | Fold Change<br>10ug | Multiple<br>Comparison p | ANOVA p<br>value | Q value |
|-------------|------------|-------------------------------------------------------------------------------------------------------|---------------------|--------------------------|------------------|---------|
| IPI00386083 | NT5C       | 5', 3'-nucleotidase, isoform 2, cytosolic                                                             | -1.3                | 0.007                    | 0.001            | 0.23    |
| IPI00470528 | RPL15      | 60S ribosomal protein L15                                                                             | -1.5                | 0.01                     | 0.006            | 0.27    |
| IPI00219155 | RPL27      | 60S ribosomal protein L27                                                                             | -1.7                | 0.001                    | 0.003            | 0.11    |
| IPI00296907 | ACOX1      | Acyl-CoA oxidase 1, palmitoyl, isoform 1, peroxisomal                                                 | -1.4                | 0.01                     | 0.003            | 0.27    |
| IPI00027178 | AP1G2      | Adaptor-related protein complex 1, gamma 2 subunit                                                    | 1.7                 | 0.01                     | 0.0006           | 0.28    |
| IPI00019901 | ADD1       | Adducin 1 (alpha), isoform 1                                                                          | -1.3                | 0.02                     | 0.007            | 0.28    |
| IPI00215901 | AK2        | Adenylate kinase 2, mitochondrial, isoform 1                                                          | -1.3                | 0.01                     | 0.00007          | 0.27    |
| IPI00291483 | AKR1C3     | Aldo-keto reductase family 1, member C3 (3-alpha hydroxysteroid dehydrogenase)                        | -1.3                | 0.03                     | 0.007            | 0.34    |
| IPI00909541 | AKR1C4     | Aldo-keto reductase family 1, member C4 (chlordecone reductase; 3-alpha hydroxysteroid dehydrogenase) | -1.3                | 0.02                     | 0.006            | 0.28    |
| IPI00004860 | RARS       | Arginyl-tRNA synthetase                                                                               | -1.4                | 0.02                     | 0.0006           | 0.28    |
| IPI00852619 | ATP10B     | ATPase, class V, type 10B                                                                             | -1.2                | 0.04                     | 0.002            | 0.35    |
| IPI00845508 | BAHCC1     | BAH domain and coiled-coil containing 1                                                               | -1.7                | 0.01                     | 0.003            | 0.28    |
| IPI00099670 | CEL        | Carboxyl ester lipase precursor                                                                       | -2.0                | 0.001                    | 0.00009          | 0.11    |
| IPI00376947 | CHKB       | Choline kinase beta, isoform 2                                                                        | -1.2                | 0.03                     | 0.001            | 0.34    |
| IPI00640313 | CPNE1      | Copine 1                                                                                              | 1.4                 | 0.008                    | 0.008            | 0.26    |
| IPI00448095 | DCXR       | Dicarbonyl/L-xylulose reductase                                                                       | -1.6                | 0.02                     | 0.008            | 0.28    |
| IPI00018798 | DNAJC17    | DnaJ (Hsp40) homolog, subfamily C, member 17                                                          | -1.5                | 0.01                     | 0.0003           | 0.28    |
| IPI00873286 | EIF3C      | Eukaryotic translation initiation factor 3, subunit 8                                                 | -1.3                | 0.02                     | 0.002            | 0.28    |
| IPI00016910 | EIF3C      | Eukaryotic translation initiation factor 3, subunit C                                                 | -1.3                | 0.03                     | 0.002            | 0.34    |
| IPI00654777 | EIF3F      | Eukaryotic translation initiation factor 3, subunit F                                                 | -1.6                | 0.00002                  | 0.000003         | 0.01    |
| IPI00033143 | EIF3K      | Eukaryotic translation initiation factor 3, subunit K                                                 | -1.4                | 0.05                     | 0.01             | 0.46    |
| IPI00383900 | RNASEH1    | Gastric cancer-related protein GCYS-20 (RNaseH-like)                                                  | -1.7                | 0.01                     | 0.0002           | 0.26    |
| IPI00054042 | GTF2I      | General transcription factor II-I, isoform 1                                                          | -1.4                | 0.05                     | 0.004            | 0.40    |
| IPI00216159 | GFPT2      | Glutamine-fructose-6-phosphate transaminase 2                                                         | 1.6                 | 0.01                     | 0.008            | 0.28    |
| IPI00909080 | GPD1       | Glycerol-3-phosphate dehydrogenase                                                                    | 1.5                 | 0.03                     | 0.0006           | 0.31    |
| IPI00966041 | GNB2L1     | Guanine nucleotide binding protein (G protein), beta polypeptide 2-like 1, variant 1                  | -1.3                | 0.02                     | 0.01             | 0.28    |
| IPI00964877 | GNB2L1     | Guanine nucleotide binding protein (G protein), beta polypeptide 2-like 1, variant 2                  | -1.3                | 0.02                     | 0.01             | 0.30    |
| IPI00020956 | HDGF       | Hepatoma-derived growth factor, variant                                                               | -1.2                | 0.04                     | 0.009            | 0.36    |
| IPI00922032 | HDGF       | Hepatoma-derived growth factor, variant                                                               | -1.2                | 0.01                     | 0.01             | 0.28    |
| IPI00465225 | HNRNPL     | Heterogeneous nuclear ribonucleoprotein L, isoform b                                                  | -1.3                | 0.04                     | 0.008            | 0.38    |
| IPI00216457 | HIST2H2AA4 | Histone H2A type 2-A                                                                                  | 1.5                 | 0.03                     | 0.009            | 0.34    |
| IPI00220855 | H2AFJ      | Histone H2A.J, isoform 1                                                                              | 1.6                 | 0.01                     | 0.002            | 0.28    |
| IPI00018278 | H2AFV      | Histone H2A.V                                                                                         | 1.6                 | 0.02                     | 0.004            | 0.28    |
| IPI00219037 | H2AFX      | Histone H2A.x                                                                                         | 1.4                 | 0.03                     | 0.01             | 0.34    |
| IPI00220403 | HIST1H2BB  | Histone H2B type 1-B                                                                                  | 1.5                 | 0.03                     | 0.005            | 0.34    |

|             |         |                                                                          |      |        |          |      |
|-------------|---------|--------------------------------------------------------------------------|------|--------|----------|------|
| IPI00477495 | H2BFS   | Histone H2B type F-S                                                     | 1.5  | 0.02   | 0.001    | 0.28 |
| IPI00009286 | MLL     | Histone-lysine N-methyltransferase, isoform 1                            | -1.4 | 0.01   | 0.001    | 0.27 |
| IPI00294398 | HADH    | Hydroxyacyl-coenzyme A dehydrogenase, mitochondrial, isoform 1           | -1.3 | 0.03   | 0.006    | 0.34 |
| IPI00795859 | IMPDH2  | IMP (inosine 5'-monophosphate) dehydrogenase 2, variant                  | -1.4 | 0.0003 | 0.000003 | 0.10 |
| IPI00791628 | IMPDH2  | IMP (inosine 5'-monophosphate) dehydrogenase 2, variant                  | -1.3 | 0.02   | 0.0007   | 0.28 |
| IPI00554788 | KRT18   | Keratin 18                                                               | -1.2 | 0.05   | 0.002    | 0.51 |
| IPI00293276 | MIF     | Macrophage migration inhibitory factor                                   | 1.7  | 0.01   | 0.0005   | 0.28 |
| IPI00291006 | MDH2    | Malate dehydrogenase, mitochondrial, variant                             | -1.3 | 0.03   | 0.0006   | 0.32 |
| IPI00012450 | NMI     | N-myc-interactor                                                         | 1.5  | 0.04   | 0.01     | 0.35 |
| IPI00304596 | NONO    | Non-POU domain-containing octamer-binding protein                        | -1.2 | 0.03   | 0.0003   | 0.34 |
| IPI00011675 | SP100   | Nuclear autoantigen Sp-100, isoform Sp100-HMG                            | 1.4  | 0.02   | 0.004    | 0.28 |
| IPI00028005 | NUP107  | Nuclear pore complex protein Nup107                                      | -1.3 | 0.03   | 0.0007   | 0.34 |
| IPI00791367 | PIIB    | Peptidylprolyl isomerase B (cyclophilin B)                               | -1.3 | 0.02   | 0.004    | 0.30 |
| IPI00100933 | PTER    | Phosphotriesterase-related protein, isoform 1                            | -1.3 | 0.001  | 0.01     | 0.11 |
| IPI00301154 | PABPC3  | Poly(A) binding protein, cytoplasmic 3                                   | -1.3 | 0.05   | 0.01     | 0.38 |
| IPI00246058 | PDCD6IP | Programmed cell death 6-interacting protein                              | -1.3 | 0.04   | 0.003    | 0.35 |
| IPI00024821 | PSMD14  | Proteasome (prosome, macropain) 26S subunit, non-ATPase, 14              | 1.7  | 0.002  | 0.0004   | 0.14 |
| IPI00006377 | POMP    | Proteasome maturation protein                                            | 1.5  | 0.008  | 0.01     | 0.26 |
| IPI00030355 | PPP1R11 | Protein phosphatase 1, regulatory (inhibitor) subunit 11                 | -1.4 | 0.05   | 0.01     | 0.45 |
| IPI00023591 | PURA    | Purine-rich element binding protein A                                    | -1.5 | 0.02   | 0.002    | 0.28 |
| IPI00013004 | PDXK    | Pyridoxal kinase, isoform 1                                              | -1.3 | 0.03   | 0.0004   | 0.31 |
| IPI00216320 | PDXK    | Pyridoxal kinase, isoform 2                                              | -1.3 | 0.03   | 0.0005   | 0.34 |
| IPI00793433 | PDXK    | Pyridoxal kinase, variant                                                | -1.9 | 0.04   | 0.001    | 0.38 |
| IPI00791490 | PDXK    | Pyridoxal kinase, variant                                                | -1.4 | 0.03   | 0.0005   | 0.32 |
| IPI00556561 | RHEBL1  | Ras homolog enriched in brain like 1, isoform 2                          | -1.4 | 0.02   | 0.004    | 0.28 |
| IPI00335280 | RPE     | Ribulose-phosphate 3-epimerase, isoform 1                                | 1.6  | 0.004  | 0.006    | 0.14 |
| IPI00021187 | RUVBL1  | RuvB-like 1, isoform 1                                                   | -1.4 | 0.005  | 0.0002   | 0.23 |
| IPI00016179 | S100A13 | S100 calcium binding protein A13                                         | 1.5  | 0.03   | 0.0003   | 0.34 |
| IPI00220038 | SRRT    | Serrate RNA effector molecule homolog, isoform 2                         | -1.3 | 0.04   | 0.001    | 0.37 |
| IPI00025318 | SH3BGRL | SH3 domain-binding glutamic acid-rich-like protein                       | -2.0 | 0.003  | 0.009    | 0.14 |
| IPI00183274 | SNX1    | Sorting nexin 1, isoform c                                               | -1.5 | 0.03   | 0.007    | 0.34 |
| IPI00383251 | SF1     | Splicing factor 1, variant                                               | -1.7 | 0.0002 | 0.003    | 0.04 |
| IPI00828110 | SF3B3   | Splicing factor 3B subunit 3, isoform 3                                  | -1.3 | 0.02   | 0.004    | 0.30 |
| IPI00221106 | SF3B2   | Splicing factor 3B, subunit 2                                            | -1.3 | 0.05   | 0.01     | 0.49 |
| IPI00010740 | SFPQ    | Splicing factor proline/glutamine-rich, isoform long                     | -1.2 | 0.05   | 0.01     | 0.40 |
| IPI00216613 | SFPQ    | Splicing factor proline/glutamine-rich, isoform short                    | -1.3 | 0.006  | 0.004    | 0.23 |
| IPI00164300 | SUCLG2  | Succinyl-CoA ligase (GDP-forming) subunit beta, mitochondrial pseudogene | -1.7 | 0.0001 | 0.000005 | 0.02 |
| IPI00784161 | SUPT6H  | Suppressor of Ty 6 homolog                                               | 1.3  | 0.04   | 0.0005   | 0.37 |

|             |          |                                                        |      |       |        |      |
|-------------|----------|--------------------------------------------------------|------|-------|--------|------|
| IPI00924677 | TBC1D5   | TBC1 domain family, member 5                           | -1.5 | 0.02  | 0.0003 | 0.28 |
| IPI00395694 | TNPO3    | Transportin-3, isoform 2                               | -1.4 | 0.009 | 0.009  | 0.26 |
| IPI00465028 | TPI1     | Triosephosphate isomerase 1, isoform 2                 | -1.3 | 0.04  | 0.002  | 0.36 |
| IPI00550689 | C22orf28 | tRNA-splicing ligase RtcB homolog                      | -1.3 | 0.03  | 0.005  | 0.35 |
| IPI00018511 | TUBB4Q   | Tubulin beta-4q chain                                  | -2.0 | 0.002 | 0.0002 | 0.14 |
| IPI00550917 | TWF2     | Twinfilin 2                                            | -1.3 | 0.04  | 0.004  | 0.35 |
| IPI00031556 | U2AF2    | U2 small nuclear RNA auxiliary factor 2, isoform 1     | -1.3 | 0.02  | 0.009  | 0.28 |
| IPI00292000 | PRPF31   | U4/U6 small nuclear ribonucleoprotein Prp31, isoform 1 | -1.3 | 0.01  | 0.001  | 0.28 |
| IPI00328285 | USP20    | Ubiquitin specific peptidase 20                        | -1.5 | 0.03  | 0.009  | 0.34 |
| IPI00294495 | UFC1     | Ubiquitin-fold modifier conjugating enzyme 1           | -1.7 | 0.03  | 0.008  | 0.34 |
