# Supplementary material
Source: PubMed Central journal article supplement (PMC3822612)
Supplement: NIHMS516529-supplement-Supplementary_Table_9.pdf [file NIHMS516529-supplement-Supplementary_Table_9.pdf]

## Supplemental Table 9. Top Molecular & Cellular Functions Identified by IPA

| Carbon Nanotube/Function              | P value*          | #** |
|---------------------------------------|-------------------|-----|
| <b>SWCNT-COOH 500 pg/ml</b>           |                   |     |
| None                                  | -                 | -   |
| <b>MWCNT-COOH 500 pg/ml</b>           |                   |     |
| Carbohydrate Metabolism               | 0.0000009-0.04    | 13  |
| Protein Synthesis                     | 0.000003-0.04     | 14  |
| Cell Death                            | 0.000008-0.04     | 29  |
| Cellular Movement                     | 0.00002-0.04      | 18  |
| Energy Production                     | 0.00003-0.03      | 6   |
| <b>MWCNT-PVP 500 pg/ml</b>            |                   |     |
| Protein Synthesis                     | 0.0000000004-0.02 | 42  |
| Post-Translational Modification       | 0.0000002-0.02    | 18  |
| Protein Folding                       | 0.0000002-0.00002 | 9   |
| RNA Post-Transcriptional Modification | 0.000001-0.02     | 17  |
| Cell Death                            | 0.000003-0.02     | 46  |
| <b>SWCNT-COOH 10 ug/ml</b>            |                   |     |
| Protein Synthesis                     | 0.00001-0.03      | 9   |
| Cell Cycle                            | 0.001-0.05        | 4   |
| Cell Morphology                       | 0.001-0.04        | 4   |
| Cellular Assembly & Organization      | 0.001-0.05        | 5   |
| Cellular Development                  | 0.001-0.05        | 7   |
| <b>MWCNT-COOH 10 ug/ml</b>            |                   |     |
| Protein Synthesis                     | 0.000000007-0.04  | 20  |
| Cell Death                            | 0.00008-0.05      | 26  |
| Cellular Assembly & Organization      | 0.0001-0.05       | 26  |
| Cell Morphology                       | 0.0003-0.05       | 21  |
| Cellular Function & Maintenance       | 0.0003-0.05       | 19  |
| <b>MWCNT-PVP 10 ug/ml</b>             |                   |     |
| Lipid Metabolism                      | 0.00009-0.05      | 12  |
| Small Molecule Biochemistry           | 0.00009-0.05      | 19  |
| RNA Post-Transcriptional Modification | 0.0001-0.002      | 6   |
| Energy Production                     | 0.0004-0.02       | 6   |

A minimum number of 3 proteins were required per function for inclusion. Shaded areas denote commonality across f-CNTs (see Venn diagram in Figure 9 of text).

\*P value shows the range of probability that the differentially expressed proteins in that group are associated with this function by chance

\*\*# refers to the number of differentially expressed proteins that are significantly associated with that particular function
