# Supplementary material
Source: PubMed Central journal article supplement (PMC3822612)
Supplement: NIHMS516529-supplement-Supplementary_Table_10.pdf [file NIHMS516529-supplement-Supplementary_Table_10.pdf]

## Supplemental Table 10. Top Canonical Pathways Identified by IPA

| Carbon Nanotube/Pathway                 | P value*       | Ratio** |
|-----------------------------------------|----------------|---------|
| <b>SWCNT-COOH 500 pg/ml</b>             |                |         |
| none                                    | -              | -       |
| <b>MWCNT-COOH 500 pg/ml</b>             |                |         |
| Cardiac $\beta$ -adrenergic Signaling   | 0.00006        | 6/139   |
| CDK5 Signaling                          | 0.00008        | 5/89    |
| EIF2 Signaling                          | 0.00008        | 7/215   |
| Glycolysis/Gluconeogenesis              | 0.00009        | 5/90    |
| Inositol Metabolism                     | 0.0004         | 2/6     |
| <b>MWCNT-PVP 500 pg/ml</b>              |                |         |
| EIF2 Signaling                          | 0.000000000003 | 19/215  |
| Regulation of eIF4 and p70S6K Signaling | 0.0000002      | 12/169  |
| Protein Ubiquitination Pathway          | 0.000002       | 14/270  |
| mTOR Signaling                          | 0.000002       | 12/199  |
| 14-3-3-mediated Signaling               | 0.000008       | 9/118   |
| <b>SWCNT-COOH 10 ug/ml</b>              |                |         |
| EIF2 Signaling                          | 0.00001        | 5/215   |
| Regulation of eIF4 and p70S6K Signaling | 0.00006        | 4/169   |
| mTOR Signaling                          | 0.0002         | 4/199   |
| Glutamate Metabolism                    | 0.001          | 2/36    |
| <b>MWCNT-COOH 10 ug/ml</b>              |                |         |
| EIF2 Signaling                          | 0.00000002     | 11/215  |
| RhoA Signaling                          | 0.0004         | 5/111   |
| Glutamate Metabolism                    | 0.001          | 3/36    |
| Actin Cytoskeleton Signaling            | 0.001          | 6/233   |
| Virus Entry via Endocytic Pathways      | 0.002          | 4/93    |
| <b>MWNT-PVP 10 ug/ml</b>                |                |         |
| EIF2 Signaling                          | 0.001          | 5/215   |
| Butanoate Metabolism                    | 0.002          | 3/61    |
| C21-Steroid Hormone Metabolism          | 0.003          | 2/21    |
| Citrate Cycle                           | 0.005          | 2/29    |
| Glutamate Metabolism                    | 0.008          | 2/36    |

Colored pathways denote commonality across f-CNTs (see Venn diagram in Figure 10 of text). Blue P values are down-regulated pathways, red P values are up-regulated pathways. Combination of Blue/Red signifies up- and down-regulation of various elements of a pathway.

\*P value is the probability that the proteins are associated with the pathway by chance.

\*\*Ratio is the number of differentially expressed proteins from dataset that are in the pathway relative to the total number of proteins in the pathway.
