# Supplementary material
Source: PubMed Central journal article supplement (PMC3822612)
Supplement: NIHMS516529-supplement-Supplementary_Table_11.pdf [file NIHMS516529-supplement-Supplementary_Table_11.pdf]

## Supplemental Table 11. Top Protein Interaction Networks Identified by IPA

| <b>Carbon Nanotube/Function</b>                                                                 | <b>Score*</b> |
|-------------------------------------------------------------------------------------------------|---------------|
| <b>SWCNT-COOH 500 pg/ml</b>                                                                     |               |
| Protein Trafficking, Cellular Growth and Proliferation, Gene Expression                         | 24            |
| <b>MWCNT-COOH 500 pg/ml</b>                                                                     |               |
| Energy Production, Nucleic Acid Metabolism, Small Molecule Biochemistry                         | 49            |
| Cellular Assembly & Organization, Cellular Function & Maintenance, Cellular Development         | 41            |
| Tumor Morphology, Carbohydrate Metabolism, Hematological System Development & Function          | 24            |
| Cell Death, Connective Tissue Disorders, Immunological Disease                                  | 22            |
| Cellular Movement, Cardiovascular System Development & Function, Cellular Development           | 18            |
| <b>MWCNT-PVP 500 pg/ml</b>                                                                      |               |
| Protein Degradation, Protein Synthesis, Cell Death                                              | 43            |
| Post-Translational Modification, Protein Folding, Cell Death                                    | 40            |
| Cellular Assembly & Organization, Cellular Compromise, Cellular Function & Maintenance          | 38            |
| Free Radical Scavenging, Cellular Movement, Connective Tissue Development & Function            | 36            |
| Gene Expression, Cell-To-Cell Signaling, Hematological System Development & Function            | 29            |
| <b>SWCNT-COOH 10 ug/ml</b>                                                                      |               |
| Protein Synthesis, Cell Function & Maintenance, Hematological System Development & Function     | 23            |
| Genetic Disorder, Nutritional Disease, Cell Death                                               | 18            |
| Gene Expression, Cancer, Immunological Disease                                                  | 13            |
| <b>MWCNT-COOH 10 ug/ml</b>                                                                      |               |
| Protein Synthesis, Cell Death, Cellular Assembly & Organization                                 | 30            |
| DNA Replication, Recombination, & Repair, Cell Death, Nervous System Development & Function     | 26            |
| Cell Cycle, Connective Tissue Development & Function, Cancer                                    | 21            |
| <b>MWCNT-PVP 10 ug/ml</b>                                                                       |               |
| Protein Synthesis, Cellular Growth & Proliferation, Cellular Development                        | 55            |
| Neurological Disease, Cellular Compromise, Protein Synthesis                                    | 23            |
| Nutritional Disease, Organismal Injury & Abnormalities, Infectious Disease                      | 21            |
| Cancer, Cellular Growth & Proliferation, Hematological System Development & Function            | 21            |
| RNA Post-Transcriptional Modification, Dermatological Diseases & Conditions, Infectious Disease | 15            |

Blue scores are down-regulated networks, red scores are up-regulated networks. Combination of Blue/Red signifies up- & down-regulation of various components of the interaction network.

\*The score is a numerical value used to rank networks according to their degree of relevance to the Network Eligible Molecules in the protein dataset. The higher the score, the lower the probability of finding the observed number of Network Eligible molecules in a given network by random chance. The network Score is based on the hypergeometric distribution and is calculated with the right-tailed Fisher's Exact Test. The score is the  $-\log(\text{Fisher's Exact test result})$ . For this example, suppose that a network of 35 molecules has a Fisher Exact Test result of  $1 \times 10^{-6}$ . The network's Score =  $-\log(\text{Fisher's Exact test result}) = 6$ . This can be interpreted as, "There is a 1 in a million chance of getting a network containing at least the same number of Network Eligible molecules by chance when randomly picking 35 genes that can be in networks from the Ingenuity Knowledge Base". The score is not an indication of the quality or biological relevance of the network; it simply calculates the approximate "fit" between each network and the Network Eligible Molecules."
